# Switching on the light: using metagenomic shotgun sequencing to characterize the intestinal microbiome of Atlantic cod

Even Sannes Riiser<sup>1\*</sup>, Thomas H.A. Haverkamp<sup>1,2</sup>, Srinidhi Varadharajan<sup>1</sup>, Ørnulf Borgan<sup>3</sup>, Kjetill S. Jakobsen<sup>1</sup>, Sissel Jentoft<sup>1</sup> and Bastiaan Star<sup>1\*</sup>

<sup>1</sup>Centre for Ecological and Evolutionary Synthesis, Department of Biosciences, University of Oslo, PO Box 1066, Blindern, N-0316 Oslo, Norway.

<sup>2</sup>Department of Epidemiology, Norwegian Veterinary Institute, Oslo, Norway

<sup>3</sup>Department of Mathematics, University of Oslo, PO Box 1053, Blindern, N-0316 Oslo, Norway.

## \* Correspondence

Even Sannes Riiser\*: [e.s.riiser@ibv.uio.no](mailto:e.s.riiser@ibv.uio.no)

Bastiaan Star\*: [bastiaan.star@ibv.uio.no](mailto:bastiaan.star@ibv.uio.no)

## Abstract

The biological roles of the intestinal microbiome and how it is impacted by environmental factors are yet to be determined in wild marine fish species. Atlantic cod (*Gadus morhua*) is an ecologically important species with a wide-spread distribution in the North Atlantic Ocean. 16S rRNA-based amplicon analyses found no geographical differentiation between the intestinal microbiome of Atlantic cod from different locations. Nevertheless, it is unclear if this lack of differentiation results from an insufficient resolution of this method to resolve fine-scaled biological complexity. Here, we take advantage of the increased resolution provided by metagenomic shotgun sequencing to investigate the intestinal microbiome of 19 adult Atlantic cod individuals from two coastal populations in Norway – located 470 km apart. Our results show that the intestinal microbiome is dominated by the *Vibrionales* order, consisting of varying abundances of *Photobacterium*, *Aliivibrio* and *Vibrio* species. Moreover, resolving the species community to unprecedented resolution, we identify two abundant species, *P. iliopiscarium* and *P. kishitanii*, which comprise over 50% of the classified reads. Interestingly, genomic data shows that the intestinal *P. kishitanii* strains have functionally intact *lux* genes, and its high abundance suggests that fish intestines form an important part of its ecological niche. These observations support a hypothesis that bioluminescence plays an ecological role in the marine food web. Despite our improved taxonomical resolution, we identify no geographical differences in bacterial community structure, indicating that the intestinal

41 microbiome of these coastal cod is colonized by a limited number of closely related bacterial  
42 species with a broad geographical distribution that are well suited to thrive in this host-  
43 associated environment.

44

## 45 **1. Introduction**

46

47 The fish intestinal microbiome comprises a complex and specialized gut bacterial community  
48 providing a multitude of biological functions in the host, including metabolism, growth,  
49 development and immunity (reviewed in Wang *et al.*, 2017; Ghanbari *et al.*, 2015; Sullam *et al.*,  
50 2012; Izvekova *et al.*, 2007). For instance, studies of laboratory-reared zebrafish have  
51 demonstrated that the intestinal microbiome regulates 212 genes stimulating gut epithelial  
52 proliferation, promotion of nutrient metabolism, and innate immune responses (Rawls *et al.*,  
53 2004). Moreover, several studies of aquaculture freshwater fish have shown that gut bacterial  
54 communities produce a wide range of digestive enzymes (Sugita *et al.*, 1997; Bairagi *et al.*,  
55 2002), and is involved in synthesis of vitamins (Sugita *et al.*, 1991). Despite this known  
56 biological importance, the composition of the intestinal microbiome in wild fish populations  
57 remains poorly understood. To date, studies of the fish intestinal microbiome have revealed a  
58 limited phylogenetic diversity, with genera from Proteobacteria, Firmicutes and Bacteroidetes  
59 constituting up to 90% of the sequence reads across different species (Verner-Jeffreys *et al.*,  
60 2003; Ward *et al.*, 2009; Ghanbari *et al.*, 2015; Givens *et al.*, 2015; Riiser *et al.*, 2018; Talwar  
61 *et al.*, 2018). Apart from this relatively low bacterial diversity, several studies have reported a  
62 limited geographical differentiation between intestinal bacterial communities, indicating a  
63 strong influence of host-associated factors on the composition of the gut microbiome (Ye *et al.*,  
64 2014; Llewellyn *et al.*, 2016; Riiser *et al.*, 2018). Nevertheless, most studies have been limited  
65 either because of their focus on cultured fish species (Desai *et al.*, 2012; Wu *et al.*, 2013; Zarkasi  
66 *et al.*, 2014, 2016; Schmidt *et al.*, 2016; Dehler *et al.*, 2017) or because of methodological  
67 approaches that offer limited taxonomical resolution (e.g. 16S rRNA amplicon sequencing (Star  
68 *et al.*, 2013; Ye *et al.*, 2014; Llewellyn *et al.*, 2016; Riiser *et al.*, 2018) or dependence on  
69 bacterial cultivation (Kim *et al.*, 2007; Martin-Antonio *et al.*, 2007; Valdenegro-Vega *et al.*,  
70 2013)). Therefore, there remains a lack of detailed, baseline compositional data comparing  
71 healthy wild fish from the same species that live in different habitats with a variety of  
72 environmental conditions (Uchii *et al.*, 2006; Egerton *et al.*, 2018).

73

74 Atlantic cod (*Gadus morhua*) is an economically, ecologically and culturally important species  
75 of the North Atlantic Ocean, and represents a unique study system of the fish gut microbiome  
76 for fundamental as well as applied purposes. First, Atlantic cod, as well as the whole gadiform  
77 lineage, has lost the Major Histocompatibility Complex (MHC) II of the adaptive immune  
78 system (Star *et al.*, 2011; Malmstrøm *et al.*, 2016). This species also has an altered set of Toll-  
79 like receptors (TLRs), with a lack of TLR 1, 2, 3 and 4, and gene expansions of the intracellular  
80 TLR 7, 8 and 9 (Star *et al.*, 2011; Malmstrøm *et al.*, 2016; Solbakken *et al.*, 2016). These  
81 components of the adaptive and innate immune system are specifically involved in bacterial  
82 and viral recognition, hence likely affect the interaction between Atlantic cod and its intestinal  
83 microbiome (Star *et al.*, 2011; Star and Jentoft, 2012; Malmstrøm *et al.*, 2016; Solbakken *et al.*,  
84 2016). Second, Atlantic cod is exposed to a variety of environmental conditions (e.g. salinity  
85 and temperature) due to its ability to exploit a wide range of ecological niches (Righton *et al.*,  
86 2010), which in turn may influence the composition of the host microbiome. It has a large  
87 geographical distribution, which comprises various subpopulations with divergent migratory  
88 and feeding behavior (Cohen *et al.*, 1990; Godø and Michalsen, 2000; Michalsen *et al.*, 2008;  
89 Link *et al.*, 2009), and hence possibly distinctive gut microbiomes. Finally, there have been  
90 significant investments to domesticate Atlantic cod for aquaculture purposes. Various factors  
91 have prevented this industry to be profitable, for instance through difficulties in immunization  
92 of juvenile cod (Samuelsen *et al.*, 2006; Froese, Rainer and Pauly, 2012), but also through to  
93 an inefficient digestion of formulated food of larvae in the pre-stomach stage (Hamre, 2006;  
94 Lie *et al.*, 2018). Providing baseline data of the natural composition of intestinal microbiome  
95 in Atlantic cod may help efforts to improve the profitability of this industry.

96  
97 The intestinal microbiome of Atlantic cod has so far been studied using both culture-based  
98 methods (Ringø *et al.*, 2006; Dhanasiri *et al.*, 2011) and culture-independent methods based on  
99 16S rRNA amplicon sequencing (Star *et al.*, 2013, Riiser *et al.* 2018). These methods show an  
100 abundance of *Bacteroidales*, *Erysipelotrichales*, *Clostridiales* and especially *Vibrionales*  
101 (Ringø *et al.*, 2006; Dhanasiri *et al.*, 2011; Star *et al.*, 2013; Riiser *et al.*, 2018). A single  
102 *Vibrionales* oligotype was found to numerically dominate the Atlantic cod intestinal  
103 microbiome, comprising more than 50% of all the sequence data (Riiser *et al.* 2018), suggesting  
104 that these microbiomes are not particularly complex. It is well known however, that 16S rRNA-  
105 based analyses can be confounded by amplification bias, 16S rRNA gene copy number  
106 variation and a lack of taxonomic resolution (Konstantinidis *et al.*, 2006; Liu *et al.*, 2008;  
107 Youssef *et al.*, 2009; Vasileiadis *et al.*, 2012; Shakya *et al.*, 2013; Birtel *et al.*, 2015; Amore *et*  
108 *al.*, 2016; Noecker *et al.*, 2016; Zhang *et al.*, 2018). It has been found that 16S rRNA has an

109 especially low power in distinguishing various *Vibrionales* species (Sawabe *et al.*, 2007;  
110 Machado and Gram, 2015), and therefore substantial species differentiation may exist in these  
111 communities in absence of 16S rRNA divergence (Konstantinidis *et al.*, 2006; Noecker *et al.*,  
112 2016). These limitations can be mitigated by the use of shotgun metagenomics, which offers  
113 enhanced detection of bacterial species, a better estimation of diversity, and a more in-depth  
114 insight into the functional composition of microbiomes (Llewellyn *et al.*, 2014; Romero *et al.*,  
115 2014; Ghanbari *et al.*, 2015; Merrifield and Rodiles, 2015; Colston and Jackson, 2016; Ranjan  
116 *et al.*, 2016; Tarnecki *et al.*, 2017). Despite these advantages, however, only a handful of studies  
117 has used metagenomics approaches to investigate the intestinal microbiome in fish, and the  
118 existing studies are all limited in their number of samples investigated, their community  
119 characterization at the lower taxonomical levels (i.e. species) or geographical sampling range,  
120 with a focus on Pacific aquaculture species (Xing *et al.*, 2013; Xia *et al.*, 2014; Hennersdorf *et*  
121 *al.*, 2016; Tyagi *et al.*, 2019). Nevertheless, there exist no studies that use metagenomic shotgun  
122 sequencing to characterize the geographical structure and community complexity in the  
123 intestinal microbiome of wild fish.

124

125 Here, we investigate the intestinal microbial community structure of 19 adult individuals of  
126 coastal Atlantic cod from different habitats in Norway, located 470 km apart (Fig. 1a) using  
127 metagenomic shotgun sequencing. No geographical differentiation of the intestinal microbiome  
128 between these locations was previously observed based on 16S rRNA amplicon sequencing  
129 (Riiser *et al.*, 2018), providing an opportunity to test the enhanced resolution of shotgun  
130 metagenomics in a spatial and environmental context. First, we compare the genome-wide  
131 taxonomic composition and diversity based on metagenomic shotgun sequencing to that of the  
132 16S rRNA marker-gene analysis. Second, we assess strain-level variation of the most abundant  
133 bacterial members of the intestinal community by using reference-based read mapping and  
134 comparing genome-wide single nucleotide variation. Finally, we explore the genome-wide  
135 coverage of the two most abundant bacterial strains in the Atlantic cod intestines to infer the  
136 functionality of specific genes and loss of genes.

137

## 138 **2. Methods**

### 139 **2.1 Sample collection**

140 Wild coastal Atlantic cod (*Gadus morhua*) specimens were collected in Lofoten  
141 (N68.0619167, W13.5921667) (10 individuals, August 2014) and Sørøya (N70.760418,

142 W21.782716) (9 individuals, September 2013) (Fig. 1a, Table S1). A 3 cm long part of the  
143 hindgut (immediately above the short, wider rectal chamber) was aseptically removed *post-*  
144 *mortem* by scalpel and stored on 70% ethanol. The samples were frozen (-20°C) for long-term  
145 storage. Relevant metadata such as length, weight, sex and maturity were registered. Age was  
146 determined by studying otoliths. Although different individuals were used here, these were  
147 collected on the same time and location as the fish used in a previous 16S rRNA-based study  
148 (Riiser *et al.*, 2018). We always strive to reduce the impact of our sampling needs on  
149 populations and individuals. Therefore, samples were obtained as a byproduct of conventional  
150 business practice. Specimens were caught by commercial vessels, euthanized by local  
151 fishermen and were intended for human consumption. Samples were taken post-mortem and no  
152 scientific experiments have been performed on live animals. This sampling follows the  
153 guidelines set by the “Norwegian consensus platform for replacement, reduction and refinement  
154 of animal experiments” (Norecopa) and does not fall under any specific legislation in Norway,  
155 requiring no formal ethics approval.

## 156 **2.2 Sample preparation and DNA extraction**

157 Intestinal samples were split open lengthwise, before the combined gut content and mucosa was  
158 gently removed using a sterile disposable spatula. Each individual sample was washed in 500  
159 µl 100% EtOH and centrifuged before the ethanol was allowed to evaporate, after which dry  
160 weight was measured before proceeding to DNA extraction. DNA was extracted from between  
161 < 10 and 300 mg dry weight of gut content using the *MoBio Powersoil HTP 96 Soil DNA*  
162 *Isolation Kit* (Qiagen, Valencia, CA, USA) according to the DNA extraction protocol (v. 4.13)  
163 utilized by the Earth Microbiome Project (Gilbert *et al.*, 2010). DNA was eluted in 100 µl  
164 Elution buffer, and stored at -20° Celsius. Due to high methodological consistency between  
165 biological replicates in previous experiments, only one sample was collected per fish (Riiser *et*  
166 *al.*, 2018).

## 167 **2.3 Sequence data generation and filtering**

168 Quality and quantity of the DNA was measured using a Qubit fluorometer (Life Technologies,  
169 Carlsbad, CA, USA), and normalized by dilution. DNA libraries were prepared using the *Kapa*  
170 *HyperPlus* kit (Roche Sequencing, Pleasanton, CA, USA) and paired-end sequenced (2x125  
171 base pairs) on an Illumina HiSeq2500 using the HiSeq SBS V4 chemistry with dual-indexing  
172 in two independent sequencing runs. Read qualities were assessed using *FastQC* (Andrews,

173 2010), before adapter removal, singleton read identification, de-duplication and further read  
174 quality trimming was performed using *Trimmomatic* (ver. 0.36) (Bolger *et al.*, 2014) and  
175 *PRINSEQ-lite* (ver. 0.20.4) (Schmieder and Edwards, 2011) (Table S2). PhiX, host and human  
176 sequences were removed by mapping reads to the phiX reference genome [GenBank:J02482.1],  
177 the Atlantic cod genome assembly (gadMor 2), (Tørresen *et al.*, 2017) and a masked version of  
178 the human genome (HG19) (Genome Reference Consortium, 2009) using *BWA* (ver. 0.7.13)  
179 (Li and Durbin, 2009) or *BBMap* (ver. 37.53) (JGI) with default parameters, and discarding  
180 matching sequences using *seqtk* (ver. 2012.11) (Li, 2012). All sequence data have been  
181 deposited in the European Nucleotide Archive (ENA) under study accession number  
182 PRJEB29346.

## 183 **2.4 Taxonomic profiling**

184 Taxonomic classification of quality-trimmed and filtered metagenomic paired-end reads was  
185 performed using *Kaiju* (ver. 1.5.0) (Menzel and Krogh, 2016) (“greedy” heuristic approach, -e  
186 5), with the NCBI *nr* database (rel. 84) (incl. proteins from fungal and microbial eukaryotes) as  
187 reference (O’Leary *et al.*, 2016). Counts of reads successfully assigned to orders and species  
188 were imported into *RStudio* (ver. 1.1.383) (Racine, 2010) based on *R* (ver. 3.4.2) (R Core Team,  
189 2017) for further processing. Final results were visualized using the R package *ggplot* (ver.  
190 2.2.1) (Wickham, 2009). Note: Based on a recent reclassification (Machado and Gram, 2017),  
191 we refer to the reference strain *Photobacterium phosphoreum* ANT-2200 (acc. nr.  
192 GCF\_000613045.2) as *Photobacterium kishitanii* (Table S3).

## 193 **2.5 Assessment of *Vibrionales* species resolution based on 16S rRNA V4 region**

194 RNA sequences of the most highly abundant *Vibrionales* species were downloaded from  
195 RefSeq (accessed 12.12.18) (Table S4), before 16S rRNA sequences were extracted using a  
196 custom script. Next, the 16S rRNA sequences were imported into *Geneious* (ver. 10.2.2)  
197 (Geneious), where the V4 regions (one or multiple from the same assembly) were identified  
198 and extracted. Finally, the V4 regions of the different *Vibrionales* species were aligned (File  
199 S1) using the MAFFT algorithm with default parameters, generating a sequence similarity  
200 matrix (Table S5).

## 201 2.6 Sequence variation analysis and genome similarity estimations

202 In order to assess the heterogeneity of *Vibrionales* species in our bacterial populations, we  
203 analyzed the sequence variation in *Vibrionales* genomes present in the intestinal metagenome  
204 of each fish. Initially, paired-end reads from each sample were mapped against 109 complete  
205 or scaffold-level *Photobacterium*, *Aliivibrio* or *Vibrio* genomes downloaded from NCBI  
206 RefSeq (rel. 84) (O’Leary *et al.*, 2016) (Table S6). The relatedness between the 15 reference  
207 genomes recruiting the highest portion of reads (Table S3) was then estimated based on  
208 Average Nucleotide Identity (ANI) and Mash genome distances using *FastANI* (ver. 1.1) (Jain  
209 *et al.*, 2018) and *Mash* (ver. 2.1) (Ondov *et al.*, 2016) (Fig. S1, Table S7). For the sequence  
210 variation analysis, paired-end reads from each individual were mapped to the 15 reference  
211 genomes using the *Snakemake* workflow (Köster and Rahmann, 2012) of *anvi’o* (ver. 5.1) (Eren  
212 *et al.*, 2015a) with default parameters in the “all-against-all” mode (with *anvi-profile --min-*  
213 *coverage-for-variability 10*). In *anvi’o*, contigs are divided into “splits” of maximum 20,000  
214 bp. Splits with outlier mean coverage values (above the 98-percentile, 4 - 7 splits per sample),  
215 potentially containing repetitive sequences, were removed, and samples of low coverage were  
216 filtered (0 - 2 samples per reference genome). For each individual sample, variable sites (with  
217 min. 10X coverage) were identified, and the mean number of these per 1000 bp calculated  
218 (variation density). Next, variable sites with a minimum of 10X coverage in *all* samples were  
219 defined as single nucleotide variants (SNVs, *anvi-gen-variability-profile --min-occurrence 1 -*  
220 *-min-coverage-in-each-sample 10*). Coverage, variation density and SNV profiles were plotted  
221 in *RStudio* following the *R* script provided by *anvi’o* (Eren *et al.*, 2015b). The *anvi’o* SNV  
222 output was converted to *.vcf* format using a custom-developed script  
223 ([https://github.com/srinidhi202/AnvioSNV\\_to\\_vcf](https://github.com/srinidhi202/AnvioSNV_to_vcf)), and the resulting *.vcf* files were used for  
224 principal component analysis (PCA) to test for geographical differences as implemented in  
225 *smartpca* (ver. 6.1.4) (*EIGENSOFT*) (Patterson *et al.*, 2006). The variant analysis results of six  
226 reference genomes that represent different species clusters (based on average nucleotide  
227 identity) are reported in the results section.

## 228 2.7 Statistical analysis

229 Differences in order-level classification between metagenomic shotgun sequencing and 16S  
230 rRNA amplicon sequencing (Fig. 2) was tested using ANOVA for compositional data (van den  
231 Boogaart and Tolosana-Delgado, 2013, section 5.3.3.2) using the R package *compositions* (ver.  
232 1.40-2) (van den Boogaart and Tolosana-Delgado, 2008). Six orders common to both

233 approaches (Fig. 2 legend, bold) and an “others” category (which contained the remaining  
234 orders) were used for the ANOVA test. Model assumptions were verified as described in section  
235 5.3.8 of van den Boogaart and Tolosana-Delgado, 2013. Within-sample diversity (alpha  
236 diversity) was calculated using the *diversity* function in the R package *vegan* (ver. 2.4-1)  
237 (Oksanen *et al.*, 2017) based on Shannon, Simpson and Inverse Simpson indices calculated  
238 from non-normalized order-level read counts. Differences in alpha diversity were studied using  
239 linear regression. The optimal model (i.e. the model that best describes the individual diversity)  
240 was identified through a “top-down” strategy including all covariates (Table S8), except age  
241 and weight, which highly correlated with length ( $r = 0.78$  and  $0.94$ ), and selected through *t*-  
242 tests. Model assumptions were verified through plotting of residuals. Differences in bacterial  
243 community structure (beta diversity) between Lofoten and Sørøya were visualized using non-  
244 metric multidimensional scaling (NMDS) plots based on the Bray-Curtis dissimilarity index,  
245 and tested using Permutational Multivariate Analysis of Variance (PERMANOVA) using the  
246 *metaMDS* and *adonis* functions in *vegan* (ver. 2.4-1) with both Bray-Curtis dissimilarity and  
247 Jaccard index. *Adonis* was run with 20,000 permutations. PERMANOVA assumes the  
248 multivariate dispersion in the compared groups to be homogeneous; this was verified ( $p > 0.05$ )  
249 using the *betadisper* function (*vegan*) (Table S9). All beta diversity analyses were based on  
250 sequence counts normalized using a common scaling procedure, following McMurdie &  
251 Holmes 2014 (McMurdie and Holmes, 2014). This method multiplies the sequence count of  
252 every unit (e.g. species) in a given library with a factor corresponding to the ratio of the smallest  
253 library size in the dataset to the library size of the sample in question, replacing rarefying (i.e.  
254 random sub-sampling to the lowest number of reads). Normalizing using this procedure  
255 effectively results in the library scaling by averaging an infinite number of repeated sub-  
256 samplings. PERMANOVA analysis was performed on normalized counts of reads classified at  
257 the order- and species level (*Kaiju*). We used Tracy-Widom and Chi-squared statistics, as  
258 implemented in *smartpca* (Patterson *et al.*, 2006), to test for significant geographical differences  
259 in the distribution of SNVs per *Vibrionales* reference genome, while correcting for multiple  
260 testing using sequential Bonferroni (Holm, 1979).

## 261 **2.8 Genome-wide characterization of *Photobacterium***

262 Genome-wide coverage of the two most abundant bacterial strains (*P. kishitanii* and *P.*  
263 *iliopiscarium*) was obtained by mapping all paired-end reads from each cod specimen toward  
264 the respective reference genomes (GCF\_000613045.2, GCF\_000949935.1), and visualized  
265 using the *anvi*’o command “*anvi-interactive*”. Next, “*anvi-export-gene-coverage-and-*



266 *detection*” (Eren *et al.*, 2015a) was used to detect genes with zero coverage in all specimens  
267 and that are therefore consistently absent in these bacterial strains. The sequences of genes  
268 from those missing regions were used in a *blastx* search (using *blast+* (ver. 2.6.0) (Altschul *et*  
269 *al.*, 1990; Camacho *et al.*, 2009)) against the *nr* database (accessed 10.12.18) using default  
270 parameters, keeping the top 5 hits. The .xml results file and gene sequences was imported into  
271 *Blast2GO* (ver. 5.2.5) (Conesa *et al.*, 2005; Conesa and Götz, 2008; Götz *et al.*, 2008, 2011),  
272 where an InterPro search (Jones *et al.*, 2014; Mitchell *et al.*, 2019), GO mapping, functional  
273 annotation and visualization was conducted with default parameters. *PHASTER* (Zhou *et al.*,  
274 2011; Arndt *et al.*, 2016) was used to screen the *P. kishitanii* genome for the presence of  
275 prophages. The regions around the identified prophage sequences were manually inspected  
276 for the presence of other phage-associated genes (e.g. capsid heads, terminases, integrases)  
277 that could have been missed by the *PHASTER* algorithm.

278  
279 The *lux* operon was not annotated in the original *P. kishitanii* RefSeq assembly  
280 (GCF\_000613045.2). Therefore, the *P. kishitanii lux* genes (Table S10) were identified using  
281 the *lux* sequences of *Photobacterium phosphoreum* (AB367391.1) in a local blast search against  
282 the *P. kishitanii* reference genome with *blast+* (ver. 2.6.0) (Altschul *et al.*, 1990; Camacho *et*  
283 *al.*, 2009), and manually annotated. Paired-end reads from each sample were then mapped  
284 against the annotated reference genome, and reads (.bam files) mapping to the *lux* genes were  
285 combined per location using *samtools* (ver. 1.3.1) (Li *et al.*, 2009) (“samtools merge”) to yield  
286 a consensus sequence for each location per *lux* gene. The coverage distribution and possible  
287 loss of function (due to insertions, deletions, stop codons etc.) of these *lux* gene consensus  
288 sequences was inspected using *Geneious* (ver. 10.2.2) (Geneious), *Integrative Genomics*  
289 *Viewer* (ver. 2.4.16) (Robinson *et al.*, 2011; Thorvaldsdóttir *et al.*, 2013) and the *ExpASy*  
290 *Translate* online tool (Artimo *et al.*, 2012).

291

### 292 **3. Results**

#### 293 **3.1 The Atlantic cod intestinal microbiome order-level composition**

294 We obtained a dataset of 198 million paired-end reads from 19 specimens caught in the coastal  
295 waters of Lofoten ( $n=10$ ) and Sørøya ( $n=9$ , Fig. 1a). After quality trimming, the number of  
296 reads for each specimen varied from 835,000 to 7,000,000 reads (average 3 million sequences),  
297 comprised between 18.2 - 91.5% (mean: 66.7%) of host (Atlantic cod) DNA and between 8.5 -  
298 81.8% (mean: 33.3%) bacterial DNA (Table 1, Table S11). 80% of the paired-end reads were

299 classified, of which 96% at the order level (Table S12). The community profiles, based on non-  
300 normalized read counts, show a large overlap when clustering individuals from Lofoten and  
301 Sørøya using multivariate non-metric multidimensional scaling (NMDS, Fig. 1b). The Atlantic  
302 cod intestinal microbiome is numerically dominated by bacteria of the order *Vibrionales*, which  
303 has a mean relative abundance of 81.8% and represents > 76% of the reads in all except four  
304 individuals (Fig. 2a, Table 2). In relative abundance, this order is followed by *Alteromonadales*  
305 (3.6%), *Fusobacteriales* (3.1%), *Clostridiales* (2.9%) and *Bacteroidales* (1.7%). In total, the  
306 five orders with highest relative abundance constitute 94% of all classified sequences. A 16S  
307 rRNA-based analysis from the same locations shows that *Vibrionales* are the most abundant,  
308 followed by *Fusobacteriales*, *Clostridiales*, *Bacteroidales* and *Alteromonadales* (Fig. 2b, Table  
309 2, reproduced from Riiser et al., 2018). A statistical comparison detects significant differences  
310 in the classification of the Atlantic cod intestinal microbiome comparing metagenomic shotgun  
311 sequencing to 16S rRNA-based analysis (ANOVA for compositional data,  $p = 10^{-10}$ ). In  
312 particular, the *Fusobacteriales* have a mean relative abundance of 17.1% in the 16S rRNA-  
313 based analysis vs. 3.1% in the metagenomic shotgun sequencing (Table 2). Overall, geographic  
314 location has no significant effect on the composition of the Atlantic cod intestinal microbiome  
315 (ANOVA for compositional data,  $p = 0.58$ ) for either the metagenomic shotgun sequencing or  
316 16S rRNA-based classification.

317 The individual samples vary in diversity estimated by Shannon (H), Simpson (D) and  
318 Inverse Simpson (1/D) indices based on non-normalized order-level read counts (Fig. S2, Table  
319 S13). The variation in alpha diversity is reflected in the abundance profile in Fig. 2a, where in  
320 particular, four Lofoten samples (01, 04, 05, 09) and one Sørøya sample (09) contain higher  
321 relative abundances of orders other than *Vibrionales*. Top-down reduction of linear regression  
322 models based on the alpha diversity indices ends up with models containing no significant  
323 covariates (Table S8), indicating that neither location, length or sex have an impact on the  
324 within-sample diversity. Similarly, PERMANOVA analysis based on the beta diversity  
325 measures Bray-Curtis and Jaccard reveals no statistically significant differences in community  
326 structure at the order level between Lofoten and Sørøya (Table 3).

### 327 **3.2 The species-level composition within *Vibrionales***

328 Overall, 55.3% of the reads are classified to the species level (Table S12). Of these,  
329 *Photobacterium*, *Aliivibrio* and *Vibrio* species are consistently found in all individuals, and  
330 constitute between 39 - 94% (mean: 77.3%) of all species-level reads (Fig. 3a). The *Vibrionales*  
331 community is dominated by *P. iliopiscarium* (mean relative abundance: 40.3%) and *P.*

332 *kishitanii* (MRA: 26.6%) (Fig. 3b), while specific samples also have a high relative abundance  
333 of *A. logei* (maximum relative abundance (MRA): 19.4%), *P. piscicola* (MRA: 38.8%), *A.*  
334 *wodanis* (MRA: 18.5%), *A. fischeri* (MRA: 10.1%) and *A. salmonicida* (MRA: 10.0%). We  
335 detect no significant difference in the intestinal *Vibrionales* species community structure  
336 between Lofoten and Sørøya (Table 3).

337 Metagenomic shotgun sequencing identifies a set of clearly separated, highly abundant  
338 *Photobacterium*, *Aliivibrio* and *Vibrio* species in the Atlantic cod intestines (Fig. 3b). We  
339 retrospectively assessed whether 16S rRNA-based taxonomic profiling is able to provide an  
340 equally detailed description of the bacterial community by analyzing the 16S V4 sequences of  
341 these *Vibrionales* species (Table S4, Fig. S3, File S1). Several of the species share identical V4  
342 sequences (Table S5), and based on 97% sequence identity—the most frequently used parameter  
343 in 16S rRNA-based taxonomical analysis—the 14 species group into three operational  
344 taxonomic units (OTUs) (Fig. 3b). In particular, the two most highly abundant *Vibrionales*  
345 species, *Photobacterium iliopiscarium* and *Photobacterium kishitanii*, share identical V4  
346 sequences together with five other *Photobacterium* species (Table S5).

### 347 **3.3 Within-*Vibrionales* levels of Single Nucleotide Variant heterogeneity**

348 We assessed the heterogeneity of the reads mapping to each of the 15 most abundant  
349 *Vibrionales* bacterial reference genomes (Table S3). These 15 genomes all obtained sufficient  
350 coverage across the majority of samples to confidently identify SNVs with a greater than 10-  
351 fold coverage. Sequence similarity estimations based on the average nucleotide identity (ANI)  
352 and mash distance among these 15 genomes reveal a clear separation between the *Aliivibrio*-,  
353 *Photobacterium*- and *Vibrio* species (Fig. S1, Table S7). The *Aliivibrio* species are more similar  
354 to each other than the *Photobacterium* species, and *Vibrio renipiscarium* has a higher sequence  
355 divergence compared to the other genomes. The overall differences in sequence diversity  
356 among the species (Fig. S1) are reflected in the results of SNV analysis (Fig. S4), e.g., species  
357 from the *Aliivibrio* cluster all have a lower SNV density than most *Photobacterium* species.  
358 Based on sequence similarity (%ANI) of these genomes, the results of six reference genomes  
359 that represent different species clusters are reported here (Fig. 4 and Fig. S1).

360 Overall, the different reference assemblies vary in the mean fold coverage, the density  
361 of variable sites within each individual sample and in the total number of SNVs observed in all  
362 samples. For instance, almost 5000 SNVs are detected in the *P. angustum* S14 genome, but the  
363 average density within specimens is low (max. 4.7/Kbp). In contrast, *P. iliopiscarium* yields  
364 less SNVs (1299) overall, yet a higher average density (max. 43.4/Kbp). The density of variable

365 sites varies across specimens for several of the reference genomes, reflecting varying levels of  
366 heterogeneity in the bacterial populations within specimens. This pattern is particularly strong  
367 for *P. iliopiscarium*, varying from 0.1 to 43.4 variant positions per Kbp per individual specimen  
368 (Fig. 4). Likewise, the variation analysis of the two *Aliivibrio* genomes (*A. salmonicida* and *A.*  
369 *sp.* 1S128) indicate that sample L\_03 consists of a complex mix of *Aliivibrio* strains. Despite  
370 the overall differences in SNV abundance between reference strains, we observe no statistically  
371 significant differences (based on Tracy-Widom and Chi-squared statistics) in SNV profiles  
372 between Lofoten and Sørøya among any of the 15 *Vibrionales* strains (Fig. S5, Table S14).

### 373 **3.4 Genome-wide discrepancies between abundant *Photobacterium* strains and** 374 **their closest relatives**

375 Per individual, 85% of the *Photobacterium iliopiscarium* genome and 45% of the  
376 *Photobacterium kishitanii* genome are sequenced to a depth of minimum 5-fold coverage,  
377 respectively (Table S15). Whereas reads aligned to *P. iliopiscarium* provide near complete  
378 coverage of the entire assembly in all individuals, reads aligned to *P. kishitanii* show consistent  
379 lack of alignments in a specific genomic region between 60 and 80 kbp (Fig. 5). This region in  
380 the Mediterranean *P. kishitanii* reference genome (Table S3) contains a prophage (Machado  
381 and Gram, 2017), and the deletion found here suggests that the North Atlantic population of  
382 this species lacks this particular prophage (30 – 50 kbp), as well as other host DNA. The  
383 difference in observed coverage between the two species translates directly to the number of  
384 genes lost; while only seven genes are absent in the Atlantic cod *P. iliopiscarium* strains, 698  
385 genes are absent (with zero coverage) in the Atlantic cod *P. kishitanii* strains compared to their  
386 reference assemblies (Fig. 5, Table S16).

387 We obtained gene ontology data for 400 of the 698 genes that are absent from the *P.*  
388 *kishitanii* strain (Table S17, Fig. S6). A striking number of sequences encodes membrane or  
389 membrane-associated cellular components (GO CC classification: membrane, membrane part,  
390 Fig. S6). Independent of functional annotation, a *blast* search indicate that the majority of the  
391 698 gene sequence reads matches *P. kishitanii* (Fig. S6), confirming the presence of this species  
392 (and not *P. phosphoreum* ANT-2200, as the reference is classified) in the Atlantic cod  
393 intestines. In contrast to *P. kishitanii*, only seven genes are absent in the Atlantic cod-associated  
394 *P. iliopiscarium* strain compared to its closest relative. Only one of these is successfully  
395 annotated, and is assigned a function in “chromosome partitioning”.

### 396 **3.5 The *Photobacterium kishitanii* lux operon**

397 *Photobacterium kishitanii* is known to contain the *lux* operon (i.e. encoding luciferase activity)  
398 necessary for bioluminescence. Due to the high relative abundance of this bacterium (or a  
399 closely related strain) in the Atlantic cod gut, and the unclear role of such a bioluminescence  
400 feature in the intestinal compartment, we investigated the putative loss of the *lux* operon in the  
401 *P. kishitanii* strain associated with the Atlantic cod intestinal samples. All *lux* genes (*luxC*, *D*,  
402 *A*, *B*, *F*, *E*, *G*) of the operon are identified in the *P. kishitanii* strain in Atlantic cod (Fig. S7,  
403 Table S10). Their mean coverage across all samples ranges from 12.5 - 21X, and the coverage  
404 of each gene per sample correlates with the total number of mapped paired reads per sample  
405 (Table S10). No insertions or deletions are observed in the *lux* operon gene sequences (File S2).  
406 We find between 5 - 23 nonsynonymous substitutions in Atlantic cod *P. kishitanii lux* genes  
407 compared to the reference sequence. None of these substitutions results in a stop-codon, and  
408 there is no indication that the translation of the complete *lux* operon is disabled in the *P.*  
409 *kishitanii* strains in the Atlantic cod intestine.

410

### 411 **4. Discussion**

412

413 Here, we have used metagenomic shotgun sequencing to provide a first in-depth  
414 characterization of the Atlantic cod intestinal microbiome determined down to species- and  
415 strain level resolutions. In contrast to previous 16S rRNA data, which yielded a single  
416 numerically dominant OTU belonging to genus *Photobacterium* (Riiser *et al.*, 2018), we find  
417 at least nine bacterial *Photobacterium* species that occur in varying abundances in the Atlantic  
418 cod gut. Based on their 16S V4 sequences, eight of these species cluster into a single OTU (at  
419 97% sequence identity), demonstrating the increased taxonomical resolution provided by  
420 metagenomic shotgun sequencing.

421

422 Two related species (*P. iliopiscarium* and *P. kishitanii*) are particularly abundant, comprising  
423 67% of reads classified to genus *Photobacterium* and more than 50% of all reads classified.  
424 Both have previously been isolated from the intestines of Atlantic cod (e.g., Dhanasiri *et al.*,  
425 2011), although these species differ in their perceived ecological niches. *P. kishitanii* is a  
426 cosmopolitan, wide-spread facultative psychrophilic bacterium (Urbanczyk *et al.*, 2011;  
427 Machado and Gram, 2017). It is most known for containing the *lux-rib* operon, which is  
428 essential for quorum sensing and generating bioluminescence in the light organs in –amongst

429 others— *Gadiform* deep-water fish (Ast and Dunlap, 2005). In contrast, *P. iliopiscarium* is a  
430 non-luminous bacterium that has been isolated from the intestines of several cold-water species,  
431 including Atlantic cod, yet the ecological distribution of this bacterium is still poorly known  
432 (Onarheim and Raa, 1990; Onarheim *et al.*, 1994; Urakawa *et al.*, 1999; Ast and Dunlap, 2005;  
433 Smith *et al.*, 2007). Based on phylogenetic analyses, *P. iliopiscarium* has lost the *lux-rib*  
434 operon, presumably due to niche specialization (Machado and Gram, 2017). The high  
435 abundance of *P. kishitanii*—with full repertoire of *lux* genes—in the Atlantic cod intestinal  
436 samples is particularly interesting. Zooplankton feeding on luminescent bacteria have been  
437 found to glow, which makes them more vulnerable to predation (Zarubin *et al.*, 2012).  
438 Bioluminescence has therefore been suggested to be an adaptation encouraging fish ingestion,  
439 allowing efficient dispersal of the bacteria through their fish hosts (Takemura *et al.*, 2014).  
440 Although luminescent bacteria have been long known from excrement pellets (Andrews *et al.*,  
441 1984) and a wide range of fish taxa (Ruby and Morin, 1979), for instance captive Atlantic  
442 halibut (*Hippoglossus hippoglossus*) (Verner-Jeffreys *et al.*, 2003), their relative abundances in  
443 wild fish intestines have never been reported. Here, we observe that such luminescent bacteria  
444 comprise an abundant component (26.6% of reads for *P. kishitanii*) of the intestinal microbiota  
445 in Atlantic cod. This observation suggests that fish intestines form a particularly rich niche for  
446 bioluminescent bacteria.

447  
448 We compared the genomic organization of the two most abundant *Photobacterium* species in  
449 the Atlantic cod intestinal microbiome to their closest relatives by investigating genome-wide  
450 alignments. A near complete read coverage across the reference genome of *P. iliopiscarium*  
451 was observed, indicative of limited large-scale genomic rearrangements in those strains  
452 sampled from the Atlantic cod intestines. In contrast, a consistent lack of read coverage in  
453 distinct genomic regions across the *P. kishitanii* reference genome demonstrates absence of  
454 specific regions in all Atlantic cod-associated strains. This lack results in the absence of nearly  
455 700 of the 4300 genes annotated on the *P. kishitanii* reference assembly. Such an observation  
456 is not uncommon among *Photobacterium* species, and as little as 25% of genes is expected to  
457 be conserved between different strains of this genus (Machado and Gram, 2017). Nevertheless,  
458 the consistent absence of the same genomic region in all individuals indicates that these  
459 intestines have been colonized by a closely related *Photobacterium kishitanii* strain in both  
460 geographical locations. Interestingly, the missing genes predominantly encode components of  
461 the cell membrane. Given that the bacterial cell membrane plays a central role in host-  
462 microbiome interaction, and the fact that Atlantic cod has lost the MHC II pathway and possess

463 a special TLR repertoire (Star *et al.*, 2011; Solbakken *et al.*, 2016), it is possible that the loss of  
464 these genes represents a functional adaptation to the peculiar immune host environment.

465

466 The functional role of *P. iliopiscarium*, *P. kishitanii* and other members of the genus  
467 *Photobacterium* in the Atlantic cod intestines, and the reason for their high abundance (host-  
468 selection or environmental exposure), remains unclear. Members of the *Photobacterium* genus  
469 have been shown to aid in the digestive process of Dover sole (*Solea solea*), i.e. by degrading  
470 chitin (MacDonald *et al.*, 1986), while others show antagonistic activity towards common  
471 bacterial pathogens in Atlantic cod (MacDonald *et al.*, 1986; Caipang *et al.*, 2010; Ray *et al.*,  
472 2012; Egerton *et al.*, 2018). Such roles in protective immunity or digestion suggest an  
473 evolutionary benefit of host selection for the colonization by *Photobacterium*. Host selection  
474 for certain taxa (classified based on 16S rRNA) has been observed in zebrafish and Atlantic  
475 salmon parr (Roeselers *et al.*, 2011; Dehler *et al.*, 2017). It may be assumed that bacteria more  
476 intimately associated with their host (i.e. through a strong association with the mucosal layer  
477 relative to the general gut content) are actively selected for. Based on such an assumption, host  
478 selection for *Photobacterium* in Atlantic cod is implied by a significantly higher abundance of  
479 this genus associated with the intestinal mucosal layer relative to the gut content based on 16S  
480 RNA classification (Riiser *et al.*, 2018). Nonetheless, it is currently not clear if this higher  
481 abundance of the genus in the mucosal layer is due to the increased selection for specific  
482 *Photobacterium* strains, e.g. *P. iliopiscarium* or *P. kishitanii*. Hence, more elaborate functional  
483 studies are required to investigate the roles of *P. iliopiscarium*, *P. kishitanii* and the other  
484 members of *Photobacterium* in the Atlantic cod intestines, and whether their high abundance  
485 are due to its unique immune system or by external, ecological factors (Star *et al.*, 2011; Star  
486 and Jentoft, 2012).

487

488 Our results shed light on the order-level classification based on 16S rRNA amplicon sequencing  
489 versus metagenomic shotgun sequencing. There are significant differences in the order-level  
490 bacterial community composition detected by the two analysis methods. For instance,  
491 *Fusobacteriales* has an average relative abundance of 17.1% based on 16S rRNA, yet comprises  
492 3.1% of the metagenomic shotgun data. Interestingly, a member of the *Fusobacteriales*  
493 (*Cetobacterium somerae*) that has been isolated from the intestinal tract of fish (Tsuchiya *et al.*,  
494 2008), has a particularly low GC content (28.5%) (ecogenomic.org, 2013). A bias against such  
495 low GC content has been observed during library preparation (for instance due to the enzymatic  
496 fragmentation applied in our protocol), amplification and sequencing (Benjamini and Speed,  
497 2012), and could explain lower *Fusobacteriales* relative abundance in the metagenomic data.

498 This lower proportion of *Fusobacteriales* may contribute to the increased relative abundance  
499 of *Vibrionales* in the metagenomic shotgun data. Despite such differences however, both  
500 methods do identify a similar set of abundant microbial taxa, and show a dominant presence of  
501 *Vibrionales* in the intestines of Atlantic cod.

502  
503 Several 16S rRNA-based studies have reported limited effects of geographic location on the  
504 composition and diversity of the fish intestinal microbiome. In Atlantic salmon (*Salmo salaris*),  
505 little differentiation was observed in populations from both sides of the Atlantic Ocean, and the  
506 intestinal microbial community composition was rather associated with life stage (Llewellyn *et al.*,  
507 2016). Similarly, the gut microbiome of invasive Silver carp (*Hypophthalmichthys molitrix*)  
508 collected at highly separated sampling spots in the Mississippi river basin was affected by  
509 sampling time rather than location (Ye *et al.*, 2014). Finally, no significant differences in  
510 intestinal microbiome composition was detected in Atlantic cod from Lofoten and Sørøya,  
511 separated by 470 km (same locations as in this study) using 16S rRNA analyses (Riiser *et al.*,  
512 2018). Our in-depth characterization of the Atlantic cod intestinal microbiome using  
513 metagenomic shotgun sequencing allowed us to re-address if significant geographical  
514 population structure could be demonstrated at the species or within-species level based on  
515 genome-wide data. First, at the level of species, we observe no significant geographical  
516 differences using genome-wide protein-based analyses. This lack of differentiation is partly due  
517 to the presence of the two *Photobacterium* species (*P. iliopiscarium* and *P. kishitanii*), which  
518 are abundant in all specimens. Second, based on SNV variation across the genome of the 15  
519 most abundant *Vibrionales* species, we find that the gut of each fish specimen contains a unique  
520 and diverse set of strains of each species, nonetheless, no significant geographical differences  
521 are observed. Both the protein-based and strain-level approaches assessing the diversity of  
522 *Vibrionales* indicate that the microbial community composition of the gut is not related to the  
523 geographic location where the cod specimens were caught. This absence of geographical  
524 substructure, even based on genome-wide data, suggests that the intestinal microbiome of  
525 Atlantic cod is colonized by a diversity of *Vibrionales* species with a large spatial distribution.  
526

## 527 **5. Conclusions**

528  
529 We here present the first characterization of the intestinal microbiome of wild Atlantic cod  
530 using genome-wide shotgun data. Based on improved resolution, we find that two closely  
531 related *Photobacterium* species (*P. iliopiscarium* and *P. kishitanii*) are particularly abundant in



532 the intestinal communities of Atlantic cod, comprising the majority of reads. Interestingly, our  
533 results show that luminescent bacteria comprise an abundant component of the intestinal  
534 microbiota in Atlantic cod. Notwithstanding our improved taxonomical resolution, no  
535 significant differentiation at the species or within-species level between Lofoten and Sørøya  
536 was detected, indicating that the composition of the intestinal microbiome is not related to the  
537 geographic location of the Atlantic cod specimens.

538

### 539 **Conflict of interest**

540 The authors declare that the research was conducted in the absence of any commercial or  
541 financial relationships that could be construed as a potential conflict of interest.

542

### 543 **Authors' contributions**

544 SJ, BS and THA conceived and designed the experiments. KSJ provided the initial framework  
545 for the study. ESR and SJ sampled the specimens. ESR performed the laboratory work. ESR  
546 and THA performed data analysis. SV created the Python script to convert the *anvi'o* format to  
547 .vcf. ØB, THA, ESR and BS interpreted the results. ESR and BS wrote the paper with input of  
548 all authors. All authors read and approved the final manuscript.

549

### 550 **Funding**

551 This work was funded by a grant from the Research Council of Norway (project no. 222378)  
552 and University of Oslo (Strategic Research Initiative) – both to KSJ.

553

### 554 **Acknowledgements**

555 We thank Børge Iversen and Helle Tessand Baalsrud for their kind help in sampling cod  
556 specimens in Lofoten, and Martin Malmstrøm, Paul Ragnar Berg and Monica Hongrø  
557 Solbakken for sampling in Sørøya.

558

### 559 **Availability of data and materials**

560 The data set generated and analyzed for this study is available in the European Nucleotide  
561 Archive (ENA), study accession number PRJEB22384, [http://www.ebi.ac.uk/ena/data/  
562 view/PRJEB29346](http://www.ebi.ac.uk/ena/data/view/PRJEB29346).

563

### 564 **References**

565

566 Altschul, S.F., Gish, W., Miller, W., Myers, E.W., and Lipman, D.J. (1990) Basic Local  
567 Alignment Search Tool. *J. Mol. Biol.* **215**: 403–410.

- 568 Amore, R.D., Ijaz, U.Z., Schirmer, M., Kenny, J.G., Gregory, R., Darby, A.C., et al. (2016) A  
569 comprehensive benchmarking study of protocols and sequencing platforms for 16S  
570 rRNA community profiling. *BMC Genomics* **17**:.
- 571 Andrews, C.C., Karl, D.M., Small, L.F., and Fowler, S.W. (1984) Metabolic activity and  
572 bioluminescence of oceanic faecal pellets and sediment trap particles. *Nature* **307**: 539.
- 573 Andrews, S. (2010) FastQC. Babraham Bioinformatics.
- 574 Arndt, D., Grant, J.R., Marcu, A., Sajed, T., Pon, A., Liang, Y., and Wishart, D.S. (2016)  
575 PHASTER: a better, faster version of the PHAST phage search tool. *Nucleic Acids Res.*  
576 **44**: 16–21.
- 577 Artimo, P., Jonnalagedda, M., Arnold, K., Baratin, D., Flegel, V., Fortier, A., et al. (2012)  
578 ExPASy: SIB bioinformatics resource portal. *Nucleic Acids Res.* **40**: 597–603.
- 579 Ast, J.C. and Dunlap, P. V. (2005) Phylogenetic resolution and habitat specificity of members  
580 of the *Photobacterium phosphoreum* species group. *Environ. Microbiol.* **7**: 1641–1654.
- 581 Bairagi, A., Ghosh, K.S., Kumar, S., and Ray, A.K. (2002) Enzyme producing bacterial flora  
582 isolated from fish. *Aquac. Int.* **10**: 109–121.
- 583 Benjamini, Y. and Speed, T.P. (2012) Summarizing and correcting the GC content bias in  
584 high-throughput sequencing. *Nucleic Acids Res.* **40**: 1–14.
- 585 Birtel, J., Walser, J., Pichon, S., and Bürgmann, H. (2015) Estimating Bacterial Diversity for  
586 Ecological Studies: Methods, Metrics, and Assumptions. *PLoS One* 1–23.
- 587 Bolger, A.M., Lohse, M., and Usadel, B. (2014) Trimmomatic: A flexible trimmer for  
588 Illumina sequence data. *Bioinformatics* **30**: 2114–2120.
- 589 van den Boogaart, K.G. and Tolosana-Delgado, R. (2013) Analyzing Compositional Data  
590 with R. Springer Verlag, Heidelberg.
- 591 van den Boogaart, K.G. and Tolosana-Delgado, R. (2008) “compositions”: A unified R  
592 package to analyze compositional data. *Comput. Geosci.* **37**: 320–338.
- 593 Caipang, C.M.A., Brinchmann, M.F., and Kiron, V. (2010) Antagonistic activity of bacterial  
594 isolates from intestinal microbiota of Atlantic cod, *Gadus morhua*, and an investigation  
595 of their immunomodulatory capabilities. *Aquac. Res.* **41**: 249–256.
- 596 Camacho, C., Coulouris, G., Avagyan, V., Ma, N., Papadopoulos, J., Bealer, K., and Madden,  
597 T.L. (2009) BLAST+: architecture and applications. *BMC Bioinformatics* **9**: 1–9.
- 598 Cohen, D.M., Inada, T., Iwamoto, T., and Scialabba, N. (1990) Gadiform fishes of the world  
599 (Order Gadiformes). An annotated and illustrated catalogue of cods, hakes, grenadiers  
600 and other gadiform fishes known to date. In, *FAO Species Catalogue*.
- 601 Colston, T.J. and Jackson, C.R. (2016) Microbiome evolution along divergent branches of the  
602 vertebrate tree of life: what is known and unknown. *Mol. Ecol.* **25**: 3776–3800.
- 603 Conesa, A. and Götz, S. (2008) Blast2GO: A Comprehensive Suite for Functional Analysis  
604 in. *Int. J. Plant Genomics*.
- 605 Conesa, A., Götz, S., García-gómez, J.M., Terol, J., Talón, M., Genómica, D., et al. (2005)  
606 Blast2GO: a universal tool for annotation , visualization and analysis in functional  
607 genomics research. *Bioinformatics* **21**: 3674–3676.
- 608 Dehler, C.E., Secombes, C.J., and Martin, S.A.M. (2017) Environmental and physiological  
609 factors shape the gut microbiota of Atlantic salmon parr (*Salmo salar* L.). *Aquaculture*  
610 **467**: 149–157.
- 611 Desai, A.R., Links, M.G., Collins, S.A., Mansfield, G.S., Drew, M.D., Van Kessel, A.G., and  
612 Hill, J.E. (2012) Effects of plant-based diets on the distal gut microbiome of rainbow  
613 trout (*Oncorhynchus mykiss*). *Aquaculture* **350–353**: 134–142.
- 614 Dhanasiri, A.K.S., Brunvold, L., Brinchmann, M.F., Korsnes, K., Bergh, Ø., and Kiron, V.  
615 (2011) Changes in the intestinal microbiota of wild Atlantic cod (*Gadus morhua* L.)  
616 upon captive rearing. *Microb. Ecol.* **61**: 20–30.
- 617 ecogenomic.org (2013) *Cetobacterium somerae* - GC content. *gtdb.ecogenomic.org*.
- 618 Egerton, S., Culloty, S., Whooley, J., Stanton, C., and Ross, R.P. (2018) The gut microbiota  
619 of marine fish. *Front. Microbiol.* **9**: 1–17.

- 620 Eren, A.M., Esen, C., Quince, C., Vineis, J.H., Morrison, H.G., Sogin, M.L., and Delmont,  
621 T.O. (2015a) Anvi'o: An advanced analysis and visualization platform for 'omics data.  
622 *PeerJ* **3**: 1–29.
- 623 Eren, A.M., Esen, C., Quince, C., Vineis, J.H., Morrison, H.G., Sogin, M.L., and Delmont,  
624 T.O. (2015b) Visualizing SNV profiles using R.
- 625 Froese, Rainer and Pauly, D. (2012) Species Fact Sheets: *Gadus morhua* (Linnaeus, 1758).  
626 Geneious ver. 10.2.2, *Geneious*.
- 627 Genome Reference Consortium (2009) Genome Reference Consortium Human Build 37  
628 (GRCh37).
- 629 Ghanbari, M., Kneifel, W., and Domig, K.J. (2015) A new view of the fish gut microbiome:  
630 Advances from next-generation sequencing. *Aquaculture* **448**: 464–475.
- 631 Gilbert, J.A., Meyer, F., Jansson, J., Gordon, J., Pace, N., Ley, R., et al. (2010) The Earth  
632 Microbiome Project: Meeting report of the “1st EMP meeting on sample selection and  
633 acquisition” at Argonne National Laboratory October 6th 2010 .
- 634 Givens, C.E., Ransom, B., Bano, N., and Hollibaugh, J.T. (2015) Comparison of the gut  
635 microbiomes of 12 bony fish and 3 shark species. *Mar. Ecol. Prog. Ser.* **518**: 209–223.
- 636 Godø, O.R. and Michalsen, K. (2000) Migratory behaviour of North-east Arctic cod, studied  
637 by use of data storage tags. *Fish. Res.* **48**: 127–140.
- 638 Götz, S., Arnold, R., Sebastián-león, P., Martín-rodríguez, S., Tischler, P., Jehl, M., et al.  
639 (2011) B2G-FAR, a species-centered GO annotation repository. *Bioinformatics* **27**: 919–  
640 924.
- 641 Götz, S., Garcia-Gomez, J.M., Terol, J., Williams, T.D., Nagaraj, S.H., Nueda, M.J., et al.  
642 (2008) High-throughput functional annotation and data mining with the Blast2GO suite.  
643 *Nucleic Acids Res.* **36**: 3420–3435.
- 644 Hamre, K. (2006) Nutrition in cod (*Gadus morhua*) larvae and juveniles. *ICES J. Mar. Sci.*  
645 **63**: 267–274.
- 646 Hennersdorf, P., Mrotzek, G., Abdul-Aziz, M.A., and Saluz, H.P. (2016) Metagenomic  
647 analysis between free-living and cultured *Epinephelus fuscoguttatus* under different  
648 environmental conditions in Indonesian waters. *Mar. Pollut. Bull.* **110**: 726–734.
- 649 Holm, S. (1979) A Simple Sequentially Rejective Multiple Test Procedure. *Scand. J. Stat.* **6**:  
650 65–70.
- 651 Izvekova, G., Izvekov, E., and Plotnikov, A. (2007) Symbiotic microflora in fishes of  
652 different ecological groups. *Biol. Bull.* **34**: 610–618.
- 653 Jain, C., Rodriguez-R, L.M., Phillippy, A.M., Konstantinidis, K.T., and Aluru, S. (2018) High  
654 throughput ANI analysis of 90K prokaryotic genomes reveals clear species boundaries.  
655 *Nat. Commun.* **9**: 1–8.
- 656 Joint Genome Institute *BBMap*.
- 657 Jones, P., Binns, D., Chang, H., Fraser, M., Li, W., Mcanulla, C., et al. (2014) Sequence  
658 analysis InterProScan 5: genome-scale protein function classification. *Bioinformatics* **30**:  
659 1236–1240.
- 660 Kim, D.-H., Brunt, J., and Austin, B. (2007) Microbial diversity of intestinal contents and  
661 mucus in rainbow trout (*Oncorhynchus mykiss*). *J. Appl. Microbiol.* **102**: 1654–64.
- 662 Konstantinidis, K.T., Ramette, A., and Tiedje, J.M. (2006) The bacterial species definition in  
663 the genomic era. *Philos. Trans. R. Soc. B Biol. Sci.* **361**: 1929–1940.
- 664 Köster, J. and Rahmann, S. (2012) Snakemake - a scalable bioinformatics workflow engine.  
665 *Bioinformatics* **28**: 2520–2522.
- 666 Li, H. (2012) *Seqtk*.
- 667 Li, H. and Durbin, R. (2009) Fast and accurate short read alignment with Burrows – Wheeler  
668 transform. *Bioinformatics* **25**: 1754–1760.
- 669 Li, H., Handsaker, B., Wysoker, A., Fennell, T., Ruan, J., Homer, N., et al. (2009) The  
670 Sequence Alignment/Map format and SAMtools. *Bioinformatics* **25**: 2078–2079.
- 671 Lie, K.K., Tørresen, O.K., Solbakken, M.H., Rønnestad, I., Tooming-klunderud, A.,

- 672 Nederbragt, A.J., et al. (2018) Loss of stomach, loss of appetite? Sequencing of the  
673 ballan wrasse (*Labrus bergylta*) genome and intestinal transcriptomic profiling  
674 illuminate the evolution of loss of stomach function in fish. *BMC Genomics* **19**: 1–17.
- 675 Link, J.S., Bogstad, B., Sparholt, H., and Lilly, G.R. (2009) Trophic role of Atlantic cod in  
676 the ecosystem. *Fish Fish.* **10**: 58–87.
- 677 Liu, Z., Desantis, T.Z., Andersen, G.L., and Knight, R. (2008) Accurate taxonomy  
678 assignments from 16S rRNA sequences produced by highly parallel pyrosequencers.  
679 *Nucleic Acids Res.* **36**: 1–11.
- 680 Llewellyn, M.S., Boutin, S., Hoseinifar, S.H., and Derome, N. (2014) Teleost microbiomes:  
681 the state of the art in their characterization, manipulation and importance in aquaculture  
682 and fisheries. *Front. Microbiol.* **5**: 207.
- 683 Llewellyn, M.S., McGinnity, P., Dionne, M., Letourneau, J., Thonier, F., Carvalho, G.R., et  
684 al. (2016) The biogeography of the Atlantic salmon (*Salmo salar*) gut microbiome. *ISME*  
685 *J* **10**: 1280–1284.
- 686 MacDonald, N.L., Stark, J.R., and Austin, B. (1986) Bacterial microflora in the gastro-  
687 intestinal tract of Dover sole (*Solea solea* L.), with emphasis on the possible role of  
688 bacteria in the nutrition of the host. *FEMS Microbiol. Lett.* **35**: 107–111.
- 689 Machado, H. and Gram, L. (2017) Comparative genomics reveals high genomic diversity in  
690 the genus *Photobacterium*. *Front. Microbiol.* **8**: 1–14.
- 691 Machado, H. and Gram, L. (2015) The *fur* gene as a new phylogenetic marker for  
692 *Vibrionaceae* species identification. *Appl. Environ. Microbiol.* **81**: 2745–2752.
- 693 Malmstrøm, M., Matschiner, M., Tørresen, O.K., Star, B., Snipen, L.G., Hansen, T.F., et al.  
694 (2016) Evolution of the immune system influences speciation rates in teleost fishes. *Nat.*  
695 *Genet.* **48**: 1204–1210.
- 696 Martin-Antonio, B., Manchado, M., Infante, C., Zerolo, R., Labella, A., Alonso, C., and  
697 Borrego, J.J. (2007) Intestinal microbiota variation in Senegalese sole (*Solea*  
698 *senegalensis*) under different feeding regimes. *Aquac. Res.* **38**: 1213–1222.
- 699 McMurdie, P.J. and Holmes, S. (2014) Waste Not, Want Not: Why Rarefying Microbiome  
700 Data Is Inadmissible. *PLoS Comput. Biol.* **10**:
- 701 Menzel, P. and Krogh, A. (2016) Fast and sensitive taxonomic classification for  
702 metagenomics with Kaiju. *Nat. Commun.* **7**:
- 703 Merrifield, D.L. and Rodiles, A. (2015) The fish microbiome and its interactions with  
704 mucosal tissues. In, *Mucosal health in Aquaculture*.
- 705 Michalsen, K., Johannesen, E., and Bogstad, B. (2008) Feeding of mature cod (*Gadus*  
706 *morhua*) on the spawning grounds in Lofoten. *ICES J. Mar. Sci.* **65**: 571–580.
- 707 Mitchell, A.L., Attwood, T.K., Babbitt, P.C., Blum, M., Bork, P., Bridge, A., et al. (2019)  
708 InterPro in 2019: improving coverage, classification and access to protein sequence  
709 annotations. 1–10.
- 710 Noecker, C., McNally, C.P., Eng, A., and Borenstein, E. (2016) High-resolution  
711 characterization of the human microbiome. *Transl. Res.* **179**: 7–23.
- 712 Norecopa Norecopa guidelines for animal experiments.
- 713 O’Leary, N.A., Wright, M.W., Brister, J.R., Ciufu, S., Haddad, D., McVeigh, R., et al. (2016)  
714 Reference sequence (RefSeq) database at NCBI: Current status, taxonomic expansion,  
715 and functional annotation. *Nucleic Acids Res.* **44**: D733–D745.
- 716 Oksanen, J., Blanchet, F.G., Friendly, M., Kindt, R., Legendre, P., McGlinn, D., et al. (2017)  
717 *vegan*: Community Ecology Package R package version 2.4–3.
- 718 Onarheim, A.M. and Raa, J. (1990) Characteristics and possible biological significance of an  
719 autochthonous flora in the intestinal mucosa of sea-water fish. *Syst. Appl. Microbiol.* **17**:  
720 197–201.
- 721 Onarheim, A.M., Wiik, R., Burghardt, J., and Stackebrandt, E. (1994) Characterization &  
722 identification of two *Vibrio* species indigenous to the intestine of fish in cold sea water;  
723 description of *Vibrio iliopiscarius* sp. nov. *Syst. Appl. Microbiol.* **17**: 370–379.

- 724 Ondov, B.D., Treangen, T.J., Melsted, P., Mallonee, A.B., Bergman, N.H., Koren, S., and  
725 Phillippy, A.M. (2016) Mash: Fast genome and metagenome distance estimation using  
726 MinHash. *Genome Biol.* **17**: 1–14.
- 727 Patterson, N., Price, A.L., and Reich, D. (2006) Population Structure and Eigenanalysis. *PLoS*  
728 *Genet.* **2**.
- 729 R Core Team (2017) R: A language and environment for statistical computing. *R Found. Stat.*  
730 *Comput. Vienna, Austria.*
- 731 Racine, J.S. (2010) Rstudio: A platform-independent ide for R and SWEAVE. *Financ. Dev.*  
732 **47**: 36–37.
- 733 Ranjan, R., Rani, A., Metwally, A., McGee, H.S., and Perkins, D.L. (2016) Analysis of the  
734 microbiome: Advantages of whole genome shotgun versus 16S amplicon sequencing.  
735 *Biochem. Biophys. Res. Commun.* **469**: 967–977.
- 736 Rawls, J.F., Samuel, B.S., and Gordon, J.I. (2004) Gnotobiotic zebrafish reveal evolutionarily  
737 conserved responses to the gut microbiota. *Proc. Natl. Acad. Sci.* **101**: 4596–4601.
- 738 Ray, A.K., Ghosh, K., and Ringø, E. (2012) Enzyme-producing bacteria isolated from fish  
739 gut: A review. *Aquac. Nutr.* **18**: 465–492.
- 740 Righton, D.A., Andersen, K.H., Neat, F., Thorsteinsson, V., Steingrund, P., Svedäng, H., et al.  
741 (2010) Thermal niche of Atlantic cod (*Gadus morhua*): Limits, tolerance and optima.  
742 *Mar. Ecol. Prog. Ser.* **420**: 1–13.
- 743 Riiser, E.S., Haverkamp, T.H.A., Borgan, Ø., Jakobsen, K.S., Jentoft, S., and Star, B. (2018)  
744 A single Vibrionales 16S rRNA oligotype dominates the intestinal microbiome in two  
745 geographically separated Atlantic cod populations. *Front. Microbiol.* **9**: 1–14.
- 746 Ringø, E., Sperstad, S., Myklebust, R., Refstie, S., and Krogdahl, Å. (2006) Characterisation  
747 of the microbiota associated with intestine of Atlantic cod (*Gadus morhua* L.).  
748 *Aquaculture* **261**: 829–841.
- 749 Robinson, J.T., Thorvaldsdóttir, H., Winckler, W., Guttman, M., Lander, E.S., Getz, G., and  
750 Mesirov, J.P. (2011) Integrative genomics viewer. *Nat. Biotechnol.* **29**: 24–26.
- 751 Roeselers, G., Mittge, E.K., Stephens, W.Z., Parichy, D.M., Cavanaugh, C.M., Guillemin, K.,  
752 and Rawls, J.F. (2011) Evidence for a core gut microbiota in the zebrafish. *ISME J.* **5**:  
753 1595–608.
- 754 Romero, J., Ringø, E., and Merrifield, D.L. (2014) The Gut Microbiota of Fish. *Aquac. Nutr.*  
755 **75**–100.
- 756 Ruby, E.G. and Morin, J. (1979) Luminous Enteric Bacteria of Marine Fishes: a Study of  
757 Their Distribution, Densities, and Dispersion. *Appl. Environ. Microbiol.* **38**: 406–411.
- 758 Samuelsen, O.B., Nerland, A.H., Jørgensen, T., Schrøder, M.B., Svåsand, T., and Bergh, Ø.  
759 (2006) Viral and bacterial diseases of Atlantic cod *Gadus morhua*, their prophylaxis and  
760 treatment: a review. *Dis. Aquat. Organ.* **71**: 239–254.
- 761 Sawabe, T., Kita-Tsukamoto, K., and Thompson, F.L. (2007) Inferring the evolutionary  
762 history of *Vibrios* by means of multilocus sequence analysis. *J. Bacteriol.* **189**: 7932–  
763 7936.
- 764 Schmidt, V., Amaral-Zettler, L., Davidson, J., Summerfelt, S., and Good, C. (2016) Influence  
765 of fishmeal-free diets on microbial communities in Atlantic salmon (*Salmo salar*)  
766 recirculation aquaculture systems. *Appl. Environ. Microbiol.* **82**: 4470–4481.
- 767 Schmieder, R. and Edwards, R. (2011) Quality control and preprocessing of metagenomic  
768 datasets. *Bioinformatics* **27**: 863–864.
- 769 Shakya, M., Quince, C., Campbell, J.H., Yang, Z.K., Schadt, C.W., and Podar, M. (2013)  
770 Comparative metagenomic and rRNA microbial diversity characterization using archaeal  
771 and bacterial synthetic communities. *Environ. Microbiol.* **15**: 1882–1899.
- 772 Smith, C.J., Danilowicz, B.S., and Meijer, W.G. (2007) Characterization of the bacterial  
773 community associated with the surface and mucus layer of whiting (*Merlangius*  
774 *merlangus*). *FEMS Microbiol. Ecol.* **62**: 90–97.
- 775 Solbakken, M.H., Tørresen, O.K., Nederbragt, A.J., Seppola, M., Gregers, T.F., Jakobsen,

- 776 K.S., and Jentoft, S. (2016) Evolutionary redesign of the Atlantic cod (*Gadus morhua* L.)  
777 Toll-like receptor repertoire by gene losses and expansions. *Sci. Rep.* **6**: 1–14.
- 778 Star, B., Haverkamp, T.H., Jentoft, S., and Jakobsen, K.S. (2013) Next generation sequencing  
779 shows high variation of the intestinal microbial species composition in Atlantic cod  
780 caught at a single location. *BMC Microbiol.* **13**: 248.
- 781 Star, B. and Jentoft, S. (2012) Why does the immune system of Atlantic cod lack MHC II?  
782 *Bioessays* **34**: 648–51.
- 783 Star, B., Nederbragt, A.J., Jentoft, S., Grimholt, U., Malmstrøm, M., Gregers, T.F., et al.  
784 (2011) The genome sequence of Atlantic cod reveals a unique immune system. *Nature*  
785 **477**: 207–10.
- 786 Sugita, H., Kawasaki, J., and Deguchi, Y. (1997) Production of amylase by the intestinal  
787 microflora in cultured freshwater fish. *Lett. Applied Microbiology* **1** **24**: 105–108.
- 788 Sugita, H., Miyajima, C., and Deguchi, Y. (1991) The vitamin B12-producing ability of the  
789 intestinal microflora of freshwater fish. *Aquaculture* **92**: 267–276.
- 790 Sullam, K.E., Essinger, S.D., Lozupone, C.A., O’Connor, M.P., Rosen, G.L., Knight, R., et al.  
791 (2012) Environmental and ecological factors that shape the gut bacterial communities of  
792 fish: a meta-analysis. *Mol. Ecol.* **21**: 3363–78.
- 793 Takemura, A.F., Chien, D.M., and Polz, M.F. (2014) Associations and dynamics of  
794 Vibrionaceae in the environment, from the genus to the population level. *Front.*  
795 *Microbiol.* **5**.
- 796 Talwar, C., Nagar, S., Lal, R., and Negi, R.K. (2018) Fish Gut Microbiome: Current  
797 Approaches and Future Perspectives. *Indian J. Microbiol.*
- 798 Tarnecki, A.M., Burgos, F.A., Ray, C.L., and Arias, C.R. (2017) Fish intestinal microbiome:  
799 diversity and symbiosis unravelled by metagenomics. *J. Appl. Microbiol.*
- 800 Thorvaldsdóttir, H., Robinson, J.T., and Mesirov, J.P. (2013) Integrative Genomics Viewer  
801 (IGV): high-performance genomics data visualization and exploration. *Brief.*  
802 *Bioinforma.* **14**: 178–192.
- 803 Tørresen, O.K., Star, B., Jentoft, S., Reinart, W.B., Grove, H., Miller, J.R., et al. (2017) An  
804 improved genome assembly uncovers prolific tandem repeats in Atlantic cod. *BMC*  
805 *Genomics* **18**: 1–23.
- 806 Tsuchiya, C., Sakata, T., and Sugita, H. (2008) Novel ecological niche of *Cetobacterium*  
807 *somerae*, an anaerobic bacterium in the intestinal tracts of freshwater fish. *Lett. Appl.*  
808 *Microbiol.* **46**: 43–48.
- 809 Tyagi, A., Singh, B., Billekallu, N.K., and Niraj, T. (2019) Shotgun metagenomics offers  
810 novel insights into taxonomic compositions, metabolic pathways and antibiotic  
811 resistance genes in fish gut microbiome. *Arch. Microbiol.*
- 812 Uchii, K., Matsui, K., Yonekura, R., Tani, K., Kenzaka, T., Nasu, M., and Kawabata, Z.  
813 (2006) Genetic and physiological characterization of the intestinal bacterial microbiota  
814 of Bluegill (*Lepomis macrochirus*) with three different feeding habits. *Microb. Ecol.* **51**:  
815 277–284.
- 816 Urakawa, H., Kita-Tsukamoto, K., and Ohwada, K. (1999) Reassessment of the taxonomic  
817 position of *Vibrio iliopiscarium* (Onarheim et al. 1994) and proposal for *Photobacterium*  
818 *iliopiscarium* comb. nov. *Int. J. Syst. Bacteriol.* **49**: 257–260.
- 819 Urbanczyk, H., Ast, J.C., and Dunlap, P. V. (2011) Phylogeny, genomics, and symbiosis of  
820 *Photobacterium*. *FEMS Microbiol. Rev.* **35**: 324–342.
- 821 Valdenegro-Vega, V., Naem, S., Carson, J., Bowman, J.P., Tejedor del Real, J.L., and  
822 Nowak, B. (2013) Culturable microbiota of ranched southern bluefin tuna (*Thunnus*  
823 *maccoyii* Castelnau). *J. Appl. Microbiol.* **115**: 923–932.
- 824 Vasileiadis, S., Puglisi, E., Arena, M., Cappa, F., Coconcelli, P.S., and Trevisan, M. (2012)  
825 Soil Bacterial Diversity Screening Using Single 16S rRNA Gene V Regions Coupled  
826 with Multi-Million Read Generating Sequencing Technologies. *PLoS One* **7**:.
- 827 Verner-Jeffreys, D.W., Shields, R., Bricknell, I.R., and Birkbeck, T.H. (2003) Changes in the

- 828 gut-associated microflora during the development of Atlantic halibut (*Hippoglossus*  
829 *rhippoglossus* L.) larvae in three British hatcheries. *Aquaculture* **219**: 21–42.
- 830 Wang, A.R., Ran, C., Ringø, E., and Zhou, Z.G. (2017) Progress in fish gastrointestinal  
831 microbiota research. *Rev. Aquac.* 1–15.
- 832 Ward, N.L., Steven, B., Penn, K., Methé, B.A., and Detrich, W.H. (2009) Characterization of  
833 the intestinal microbiota of two Antarctic notothenioid fish species. *Extremophiles* **13**:  
834 679–685.
- 835 Wickham, H. (2009) Ggplot2.
- 836 Wu, S.G., Tian, J.Y., Gatesoupe, F.J., Li, W.X., Zou, H., Yang, B.J., and Wang, G.T. (2013)  
837 Intestinal microbiota of Gibel carp (*Carassius auratus gibelio*) and its origin as revealed  
838 by 454 pyrosequencing. *World J. Microbiol. Biotechnol.* **29**: 1585–1595.
- 839 Xia, J.H., Lin, G., Fu, G.H., Wan, Z.Y., Lee, M., Wang, L., et al. (2014) The intestinal  
840 microbiome of fish under starvation. *BMC Genomics* **15**: 266.
- 841 Xing, M., Hou, Z., Yuan, J., Liu, Y., Qu, Y., and Liu, B. (2013) Taxonomic and functional  
842 metagenomic profiling of gastrointestinal tract microbiome of the farmed adult turbot  
843 (*Scophthalmus maximus*). *FEMS Microbiol. Ecol.* **86**: 432–443.
- 844 Ye, L., Amberg, J., Chapman, D., Gaikowski, M., and Liu, W.T. (2014) Fish gut microbiota  
845 analysis differentiates physiology and behavior of invasive Asian carp and indigenous  
846 American fish. *ISME J.* **8**: 541–551.
- 847 Youssef, N., Sheik, C.S., Krumholz, L.R., Najjar, F.Z., Roe, B.A., and Elshahed, M.S. (2009)  
848 Comparison of Species Richness Estimates Obtained Using Nearly Complete Fragments  
849 and Simulated Pyrosequencing-Generated Fragments in 16S rRNA Gene-Based  
850 Environmental Surveys. *Appl. Environ. Microbiol.* **75**: 5227–5236.
- 851 Zarkasi, K.Z., Abell, G.C.J., Taylor, R.S., Neuman, C., Hatje, E., Tamplin, M.L., et al. (2014)  
852 Pyrosequencing-based characterization of gastrointestinal bacteria of Atlantic salmon  
853 (*Salmo salar* L.) within a commercial mariculture system. *J. Appl. Microbiol.* **117**: 18–  
854 27.
- 855 Zarkasi, K.Z., Taylor, R.S., Abell, G.C.J., Tamplin, M.L., Glencross, B.D., and Bowman, J.P.  
856 (2016) Atlantic Salmon (*Salmo salar* L.) Gastrointestinal Microbial Community  
857 Dynamics in Relation to Digesta Properties and Diet. *Microb. Ecol.* **71**: 589–603.
- 858 Zarubin, M., Belkin, S., Ionescu, M., and Genin, A. (2012) Bacterial bioluminescence as a  
859 lure for marine zooplankton and fish. *Proc. Natl. Acad. Sci.* **109**: 853–857.
- 860 Zhang, J., Ding, X., Guan, R., Zhu, C., Xu, C., Zhu, B., et al. (2018) Evaluation of different  
861 16S rRNA gene V regions for exploring bacterial diversity in a eutrophic freshwater  
862 lake. *Sci. Total Environ.* **618**: 1254–1267.
- 863 Zhou, Y., Liang, Y., Lynch, K.H., Dennis, J.J., and Wishart, D.S. (2011) PHAST: A Fast  
864 Phage Search Tool. *Nucleic Acids Res.* **39**: 347–352.

865  
866

## 867 **Tables**

868

869 **Table 1: Metagenomic sequences before and after trimming, quality filtering and host**  
870 **DNA removal.** The table shows per sample the number of original (raw) reads, the percentage  
871 of reads remaining after trimming and filtering, percentage of host DNA, percentage of bacterial  
872 DNA and the final number of reads used in the microbiome analysis. PhiX- and human DNA  
873 sequences represent a negligible proportion, and are therefore excluded from the table. The  
874 bottom two rows show total and mean values per column. On average, 33.3% of the quality  
875 filtered reads per sample are used for microbiome analysis. For details, see Table S11.

876

| Sample        | Raw reads          | After trimming/filtering (%) | quality (%) | Host DNA (%) | Bacterial DNA (%) | Final reads       |
|---------------|--------------------|------------------------------|-------------|--------------|-------------------|-------------------|
| L_01          | 10 883 740         | 85.9                         |             | 87.3         | 12.7              | 1 187 649         |
| L_02          | 11 140 950         | 87.9                         |             | 62.2         | 37.8              | 3 699 538         |
| L_03          | 9 891 322          | 90.2                         |             | 41.2         | 58.8              | 5 249 515         |
| L_04          | 10 587 865         | 86.9                         |             | 85.2         | 14.8              | 1 364 663         |
| L_05          | 8 423 091          | 89.1                         |             | 57.7         | 42.3              | 3 171 737         |
| L_06          | 10 879 319         | 89.6                         |             | 30.5         | 69.5              | 6 772 948         |
| L_07          | 10 082 237         | 91.8                         |             | 31.3         | 68.7              | 6 361 506         |
| L_08          | 9 114 703          | 87.3                         |             | 80.5         | 19.5              | 1 549 210         |
| L_09          | 11 105 189         | 89.1                         |             | 62.2         | 37.8              | 3 733 846         |
| L_10          | 11 140 743         | 84.7                         |             | 86.0         | 14.0              | 1 320 875         |
| S_01          | 10 631 475         | 86.0                         |             | 87.7         | 12.3              | 1 121 431         |
| S_02          | 11 527 589         | 85.6                         |             | 91.5         | 8.5               | 834 564           |
| S_03          | 9 855 514          | 84.2                         |             | 83.7         | 16.3              | 1 353 671         |
| S_04          | 9 259 707          | 92.6                         |             | 18.2         | 81.8              | 7 018 741         |
| S_05          | 11 539 193         | 82.2                         |             | 79.3         | 20.7              | 1 959 505         |
| S_06          | 10 272 359         | 84.8                         |             | 85.7         | 14.3              | 1 247 744         |
| S_07          | 14 395 326         | 86.5                         |             | 77.7         | 22.3              | 2 779 436         |
| S_08          | 9 189 209          | 87.4                         |             | 69.7         | 30.3              | 2 431 383         |
| S_09          | 8 476 896          | 88.6                         |             | 50.4         | 49.6              | 3 727 749         |
| <b>Total:</b> | <b>198 396 427</b> |                              |             |              |                   | <b>56 885 711</b> |
| <b>Mean:</b>  | <b>10 441 917</b>  | <b>87.4</b>                  |             | <b>66.7</b>  | <b>33.3</b>       | <b>2 993 985</b>  |

877

878

879

880

881

882

883

**Table 2: The 10 most abundant orders in the Atlantic cod intestinal microbiome.** The table shows the ten most highly abundant orders in the metagenomic shotgun sequencing analysis, their mean, minimum and maximum relative abundance. The corresponding values from the 16S rRNA-based analysis are reproduced from Riiser et. al. (2018). NP: Not present.

| Order                   | Metagenomic (n = 19) |          |          | 16S rRNA (n = 22) |          |          |
|-------------------------|----------------------|----------|----------|-------------------|----------|----------|
|                         | Mean (%)             | Min. (%) | Max. (%) | Mean (%)          | Min. (%) | Max. (%) |
| <i>Vibrionales</i>      | 81.8                 | 46.7     | 95.4     | 64.3              | 27.4     | 97.3     |
| <i>Alteromonadales</i>  | 3.6                  | 0.7      | 11.3     | 1.8               | 0.1      | 5.5      |
| <i>Fusobacteriales</i>  | 3.1                  | 0.0      | 25.4     | 17.1              | 0.3      | 39.9     |
| <i>Clostridiales</i>    | 2.9                  | 0.1      | 17.4     | 5.5               | 0.2      | 22.6     |
| <i>Bacteroidales</i>    | 1.7                  | 0.0      | 15.4     | 4.6               | 0.0      | 22.9     |
| <i>Enterobacterales</i> | 1.2                  | 0.8      | 1.7      | NP                | -        | -        |



|                          |     |     |      |     |     |      |
|--------------------------|-----|-----|------|-----|-----|------|
| <i>Oceanospirillales</i> | 0.9 | 0.1 | 14.4 | 0.0 | 0.0 | 0.2  |
| <i>Bacillales</i>        | 0.5 | 0.1 | 1.8  | NP  | -   | -    |
| <i>Mycoplasmatales</i>   | 0.2 | 0.0 | 1.1  | 3.0 | 0.0 | 12.1 |
| <i>Pseudomonadales</i>   | 0.3 | 0.1 | 1.6  | 0.0 | 0.0 | 0.5  |

884  
885  
886  
887  
888  
889  
890  
891

**Table 3: PERMANOVA analysis of diversity differences between bacterial communities from Lofoten and Sørøya (beta diversity).** The table shows  $R^2$  and  $p$ -values from multivariate statistical analyses to test for community composition differences based on reads classified at order- and species level. The results are based on read counts normalized by common scaling. Degrees of freedom ( $df$ ): 18.

|                                     |            | <b>Bray-Curtis</b> | <b>Jaccard</b> |
|-------------------------------------|------------|--------------------|----------------|
| <b>Order-level classification</b>   | $R^2$      | 0.048              | 0.051          |
|                                     | $p$ -value | 0.409              | 0.388          |
| <b>Species-level classification</b> | $R^2$      | 0.035              | 0.033          |
|                                     | $p$ -value | 0.617              | 0.763          |

892  
893  
894  
895

### Figure legends

896 **Figure 1: Microbial intestinal communities of wild Atlantic cod from two locations. (A)**  
897 Map of sampling locations. **(B)** Non-metric multidimensional scaling (NMDS) plot of non-  
898 normalized, order-level sequence counts from samples from Lofoten (*red*) and Sørøya (*blue*)  
899 based on Bray-Curtis dissimilarity. The stress value of the NMDS plot is 0.22.

900

901 **Figure 2: Taxonomic composition of the intestinal microbiome in Atlantic cod specimens**  
902 **from Lofoten and Sørøya. (A)** Relative abundance of metagenomic shotgun sequences  
903 classified to bacterial orders. Colors represent the 30 orders with highest relative abundance,  
904 including reads that could not be assigned to the order level (*yellow*). Numbers 1-10 and 1-9  
905 represent individual specimens. Bars below the stacked bar plot show the square root  
906 transformed counts of paired-end reads classified to order level per individual. **(B)** Relative  
907 abundance of 16S rRNA V4 sequences from Riiser et al. 2018 classified to bacterial orders.  
908 Numbers 1-12 and 1-10 represent individual specimens. Taxa in bold are identified by both  
909 methods.

910

911 **Figure 3: Diversity of species within *Vibrionales*. (A)** Proportion of reads per sample  
912 classified as either *Photobacterium*, *Aliivibrio* or *Vibrio* species to all reads classified to species

913 level. Percentages are shown along the x-axis. **(B)** Relative abundance of *Photobacterium*,  
914 *Aliivibrio* and *Vibrio* species in the Atlantic cod intestinal microbiome, as determined by  
915 protein-level classification of paired-end sequences. Colors represent the 15 species with  
916 highest relative abundance, and numbers 1-10 and 1-9 represent individual specimens. The  
917 legend is ordered by OTU membership based on clustering of the species' 16S rRNA V4  
918 sequences at a 97% sequence similarity level. \**Photobacterium kishitanii* strain previously  
919 classified as *Photobacterium phosphoreum* strain ANT-2200. \*\*No V4 sequence of sufficient  
920 length available.

921

#### 922 **Figure 4: Variation analysis of *Vibrionales* reference genomes.**

923 For six *Vibrionales* reference genomes, the figure displays (from top to bottom) (1) read  
924 coverage per single nucleotide variant (SNV) position in each sample from Lofoten (*red*  
925 *numbers*) and Sørøya (*blue numbers*), (2) variation density (number of variable positions per  
926 kbp. reported in each individual sample, independent of coverage in the other samples) per  
927 sample and (3) heatmap of a randomly chosen subset of 400 SNVs. In the heatmap, each row  
928 represents a unique variable nucleotide position, where the color of each tile represents the two  
929 most frequent competing nucleotides in that position. The shade of each tile represents the  
930 square root-normalized ratio of the most frequent two bases at that position (i.e., the more  
931 variation in a nucleotide position, the less pale the tile is). The y-axis of the coverage- and  
932 variation density plots are scaled across the reference genomes. For each genome, the density  
933 plot (on top) is annotated with the maximum variation density value (*grey number*).

934

#### 935 **Figure 5: Representation of the two most abundant *Photobacterium* species among the** 936 **individual samples.**

937 For each of the two most abundant *Photobacterium* species in the Atlantic cod samples,  
938 *Photobacterium iliopiscarium* **(A)** and *Photobacterium kishitanii* **(B)**, the figure gives an  
939 overview of the sequence coverage distribution at the assembly level (circle) and gene level  
940 (upper right square). In the assembly overview, each bar represents 20,000 bp. of a contig.  
941 Starting from the center, the concentric rings display the GC %, log<sub>10</sub> coverage of the 19  
942 samples, and predicted ribosomal RNAs. The coverage scale is identical for all samples, and  
943 the maximum value is given in the extracted selection above the assembly overview. The  
944 assembly overview metadata shows information on the total number of reads mapped per  
945 sample, and physical parameters associated with each individual fish. In the gene overview,  
946 each bar represents an individual gene, and the genes are ordered by differential coverage across  
947 samples. Maximum log<sub>10</sub> coverage is given below the figure. The metadata gives information

948 of the total number of reads and the number and percentage of reads mapped. In contrast to the  
949 incomplete *P. iliopiscarium* assembly (289 contigs) (A), the *P. kishitanii* assembly (B) consists  
950 of only three scaffolds, annotated in the outer layer. For *P. kishitanii*, the presence of the *lux*  
951 operon is annotated with a black square. The (\*) denotes sections of the reference genome  
952 completely missing in *P. kishitanii* in the Atlantic cod intestines, while (\*\*) denotes genes in  
953 the reference genome absent in the *P. kishitanii* in the cod samples.

954

## 955 **Supplementary figure captions**

956

### 957 **Figure S1: Similarity of 15 *Vibrionales* reference genomes.**

958 Heatmap showing the similarity of the reference genomes of the 15 most abundant  
959 *Vibrionales* species present in the Atlantic cod samples, based on (A) % Average Nucleotide  
960 Identity and (B) MASH distance. Squares with a black border in panel (A) represent the  
961 selection of reference genomes presented in Fig. 4.

962

### 963 **Figure S2: Within-sample diversity of Atlantic cod.**

964 Boxplots of Shannon (A), Simpson (B) and Inverse Simpson (C) diversity in samples from  
965 Lofoten and Sørøya. The samples are grouped by location, and each of the 19 individuals is  
966 represented by a point. The middle band represents the median, while the upper and lower  
967 band shows the 75<sup>th</sup> and 25<sup>th</sup> percentile. The boxplots also show the minimum and maximum  
968 alpha diversity values.

969

### 970 **Figure S3: Multiple alignment of *Vibrionales* 16S V4 sequences.**

971 The figure shows a multiple alignment of the 16S V4 region of the most highly abundant  
972 *Photobacterium*, *Vibrio* and *Aliivibrio* species (Table S4). The full alignment is supplied as a  
973 .fasta file in File S1, and the corresponding similarity matrix is shown in Table S5.

974

### 975 **Figure S4: Variation analysis of 15 *Vibrionales* reference genomes.**

976 For each of the 15 most abundant *Vibrionales* genomes, the figure displays (from top to  
977 bottom), (1) read coverage per single nucleotide variant (SNV) position in each sample, (2)  
978 variation density (number of variable positions per Kbp. reported in each individual sample,  
979 independent of coverage in the other samples) per sample and (3) heatmap of a randomly  
980 chosen subset of 400 SNVs. In the heatmap, each row represents a unique variable nucleotide  
981 position, where the color of each tile represents the two most frequent competing nucleotides  
982 in that position. The shade of each tile represents the square root-normalized ratio of the most

983 frequent two bases at that position (i.e., the more variation in a nucleotide position, the less  
984 pale the tile is). The y-axis of the coverage- and variation density plots are scaled across the  
985 reference genomes, and the mean SNV coverage across all samples is noted to the right of  
986 each coverage plot. For each genome, the density plot is annotated with the maximum  
987 variation density value. The total number of SNVs identified per reference genome is noted in  
988 parentheses after the strain name. Samples from Lofoten are numbered in red, while samples  
989 from Sørøya are numbered in blue.

990

991 **Figure S5: Principal component analysis (PCA) of SNVs in Lofoten and Sørøya.**

992 Principal component analysis of single nucleotide variant (SNV) distribution in individuals  
993 from Lofoten (red) and Sørøya (blue). Each plot represents one of the 15 *Vibrionales*  
994 reference genomes with highest mean abundance, and the ordering is similar to the 15 SNV  
995 plots in Fig. S4. Overlapping clusters indicate no spatial separation of the Atlantic cod  
996 intestinal microbiome. The *p*-value from a Chi-squared test of geographical differences is  
997 included in each plot. Detailed statistics for each plot are given in Table S14.

998

999 **Figure S6: Functional analysis of the 698 *P. kishitanii* genes missing in our closely related  
1000 *Photobacterium* strain.**

1001 **(A)** Overview of the complexes or compartments where the gene products of the missing genes  
1002 are potentially active. The x-axis represents the number of gene sequences assigned to each GO  
1003 (Gene ontology) category. **(B)** Overview of the taxonomy affiliated with hits from a blast search  
1004 with the 698 gene sequences. The top five hits were kept for each individual sequence search.  
1005 The x-axis represents the number of hits associated with each taxonomical category.

1006

1007 **Figure S7: Coverage of the *lux* operon in *Photobacterium kishitanii*.**

1008 The figure shows the coverage of the *Photobacterium kishitanii lux* operon, as displayed in  
1009 the *Integrative Genomics Viewer*. The coverage of individual samples has been summed for  
1010 both Lofoten (max. coverage: 401X) and Sørøya (max. coverage 228X). The horizontal red  
1011 bars represent the individual *lux* genes in the operon (*luxC*, *luxD*, *luxA*, *luxB*, *luxF*, *luxE* and  
1012 *luxG*).

1013

1014 **Supplementary file captions**

1015

1016 **File S1: Multiple alignment of *Vibrionales* 16S V4 sequences in .fasta format.**

1017 The file contains a .fasta-formatted multiple alignment of the 16S V4 region of the most  
1018 highly abundant *Photobacterium*, *Vibrio* and *Aliivibrio* species (Table S4).

1019

1020 **File S2: *Lux* gene sequences of *Photobacterium kishitanii* in .fasta format.**

1021 The file contains, for each gene in the lux operon, the reference genome sequence and the  
1022 consensus sequence from both Lofoten and Sørøya.

1023

1024 **Supplementary table captions**

1025

1026 **Table S1: Metadata**

1027 Metadata collected for all specimens used in the study. Red and blue bars are applied to  
1028 visualize associations between weight, length and age.

1029

1030 **Table S2: Filtering parameters**

1031 Parameters used for quality filtering and trimming of metagenomic shotgun sequences in  
1032 *Trimmomatic* (ver. 0.36) and *PRINSEQ-lite* (ver. 0.20.4).

1033

1034 **Table S3: *Vibrionales* genomes used for ANI- and variation analysis**

1035 Overview of the 15 *Vibrionales* reference genomes used for genome similarity analysis  
1036 measured by Average Nucleotide Identity (ANI) and variation analysis for the identification  
1037 of single nucleotide variants (SNVs) within each genome. These genomes had the highest  
1038 mean abundance among our samples after reference mapping.

1039

1040 **Table S4: Accessions used for 16S V4 sequence analysis**

1041 The table shows all genomes (assemblies) used for the retrieval of 16S sequences  
1042 ("..rna\_from\_genomic.fna.gz) used in the multiple alignment of *Vibrionales* V4 sequences.

1043

1044 **Table S5: Similarity (% identity) of V4 sequences**

1045 The matrix shows the % identity between the 16S V4 region from the different *Vibrionales*  
1046 species. Green cells indicate an identity of 100%, yellow an identity  $\geq 97\%$ .

1047

1048 **Table S6: *Vibrionales* reference genomes**

1049 The table lists all reference genomes used for mapping of paired-end reads from the 19  
1050 intestinal microbiome samples.

1051

1052 **Table S7: Reference genomes similarity**

1053 Results from genome similarity analyses based on average nucleotide identity (ANI) and  
1054 mash distance. From the top: Table A) Jspecies website - ANIb, Table B) Jspecies website -  
1055 Tetra, Table C) mash and Table D) fastANI. Plots in Fig. S3 are based on data from fastANI  
1056 and mash.

1057  
1058 **Table S8: Alpha diversity differences - Linear regression model**

1059 Results from linear regression analysis used in testing for significant effects of location, sex  
1060 or length on alpha diversity. The beyond optimal model including all covariates is presented  
1061 here. The "top-down" strategy, selecting suitable covariates through t-tests, results in an  
1062 "optimal" model with no covariates, indicating that neither location, sex or length have a  
1063 significant effect on alpha diversity.

1064  
1065 **Table S9: Homogeneity tests and PERMANOVA results for three datasets**

1066 Results from homogeneity and PERMANOVA tests on the datasets based on order- and  
1067 species-level read counts. All tests were performed on normalized data using the beta  
1068 diversity measures Bray-Curtis dissimilarity and Jaccard index. *P*-values are marked in bold;  
1069 values < 0.05 indicate statistical significance.

1070  
1071 **Table S10: *Photobacterium kishitanii lux* operon**

1072 The table shows accession number, length, position, and mean coverage per sample for each  
1073 of the genes in the *Photobacterium kishitanii lux* operon. Gene sequence are given in the  
1074 rightmost column.

1075  
1076 **Table S11. Sample sizes**

1077 Number of reads per sample before, during and after the trimming and filtering steps. The  
1078 final two columns show the number of classified paired-end reads and its percentage of all  
1079 paired-end reads. The lower table shows a summary of the data per location.

1080  
1081 **Table S12. Classification of sequences by *Kaiju* (ver. 1.5.0)**

1082 The table shows the numbers of total classified reads and number of reads classified at the  
1083 species and order level per sample. A detailed overview of reads per order-level taxon per  
1084 sample starts at column P. The lower table shows the first part of the same data, but at a  
1085 relative scale. Sums and mean values are given in the green and yellow rows.

1086

1087 **Table S13: Alpha diversity values**

1088 Alpha diversity estimates of the Atlantic cod intestinal microbial samples, calculated from  
1089 non-normalized counts of reads classified at order level. See also fig. S1.

1090

1091 **Table S14: Significance tests of SNV distributions.**

1092 For each of the 15 *Vibrionales* reference genomes, the tables show statistics for PCA of SNV  
1093 distribution (Fig. S4, Fig. S5), including significance of two first PC axes (Tracy-Widom  
1094 Statistic) and significance of between-group testing (Chi-square test). No Tracy-Widom *p*-  
1095 values are significant after sequential Bonferroni correction (right table).

1096

1097 **Table S15: Coverage breadth of *P. iliopiscarium* and *P. kishitanii***

1098 The tables show per sample the portion of each reference genome that is covered at a  
1099 sequencing depth of at least 5X or 10X.

1100

1101 **Table S16: Genome- and gene level features of *P. iliopiscarium* and *P. kishitanii***

1102 For each of the two most highly abundant *Vibrionales* species in the Atlantic cod gut, the  
1103 table shows information on assembly, total number of genes, total number of annotated genes  
1104 and the number of genes with zero coverage in the Atlantic cod samples.

1105

1106 **Table S17: Functional annotation of the 698 missing *Photobacterium kishitanii* genes**

1107 The table shows functional annotation data for each of the 698 genes absent in the  
1108 *Photobacterium kishitanii* strain associated with Atlantic cod compared to its most closely  
1109 related reference genome (GCF\_000613045.2).

## Figure 1

a)

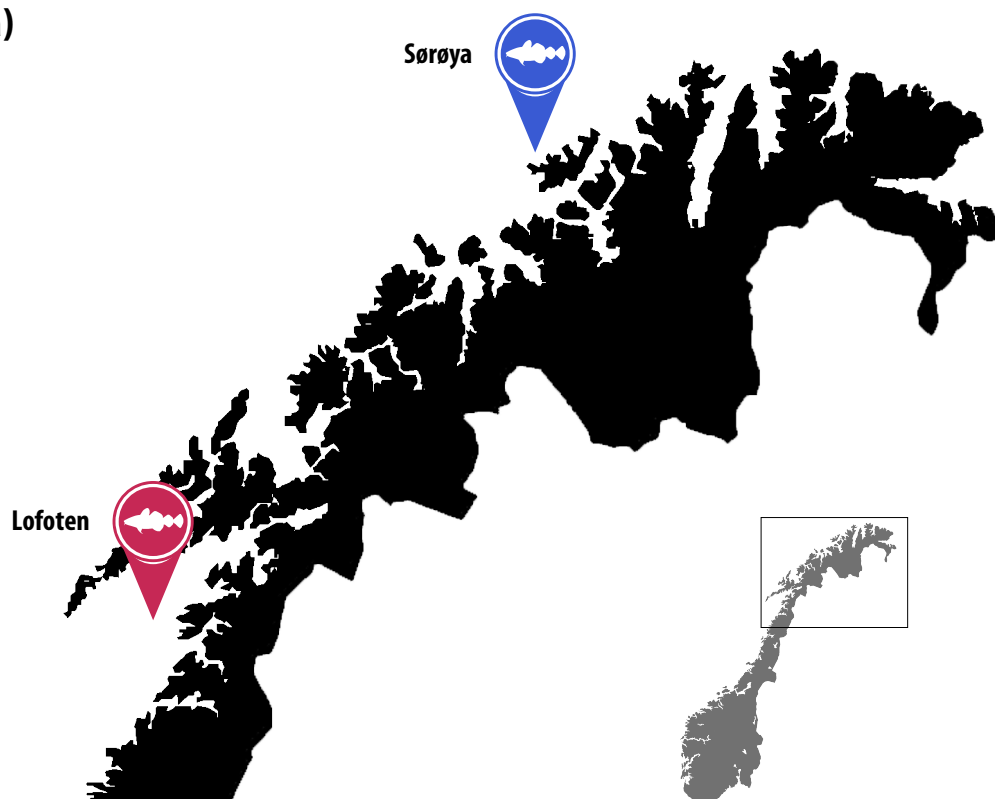

b)

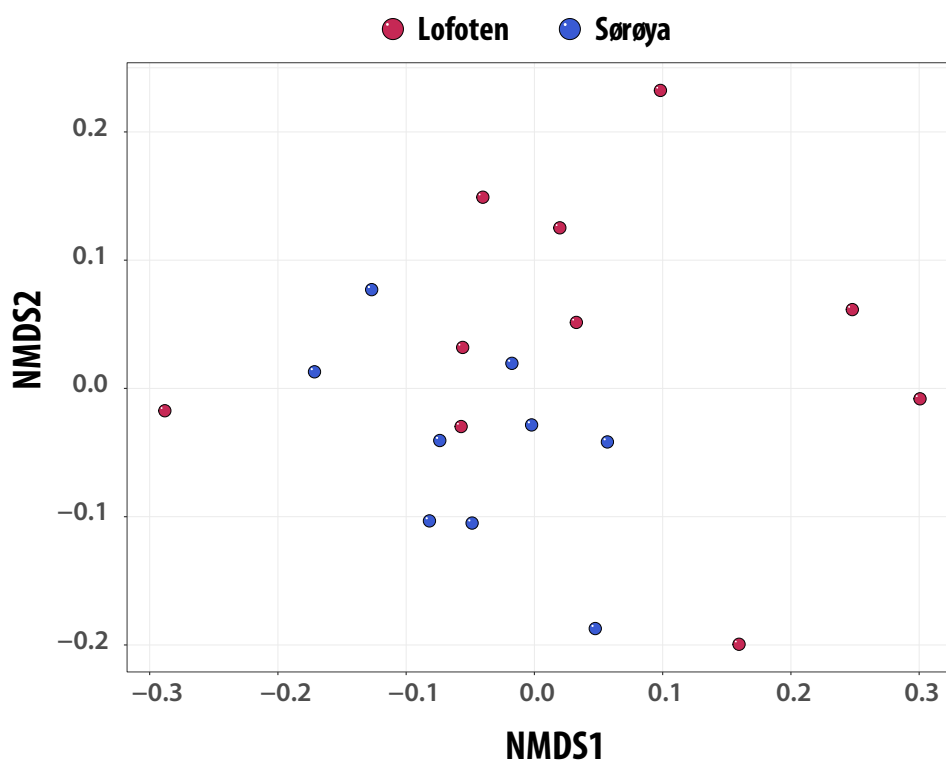



## Figure 2

a)

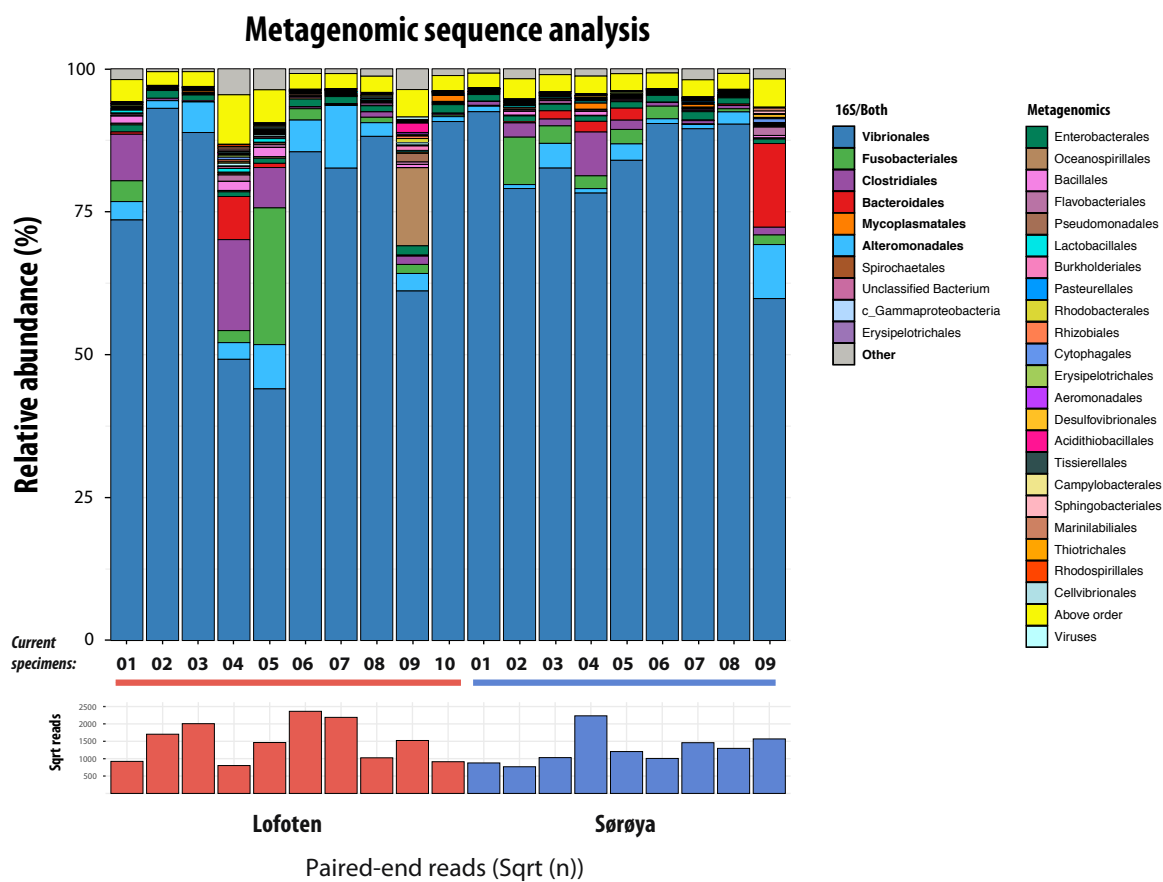

b)

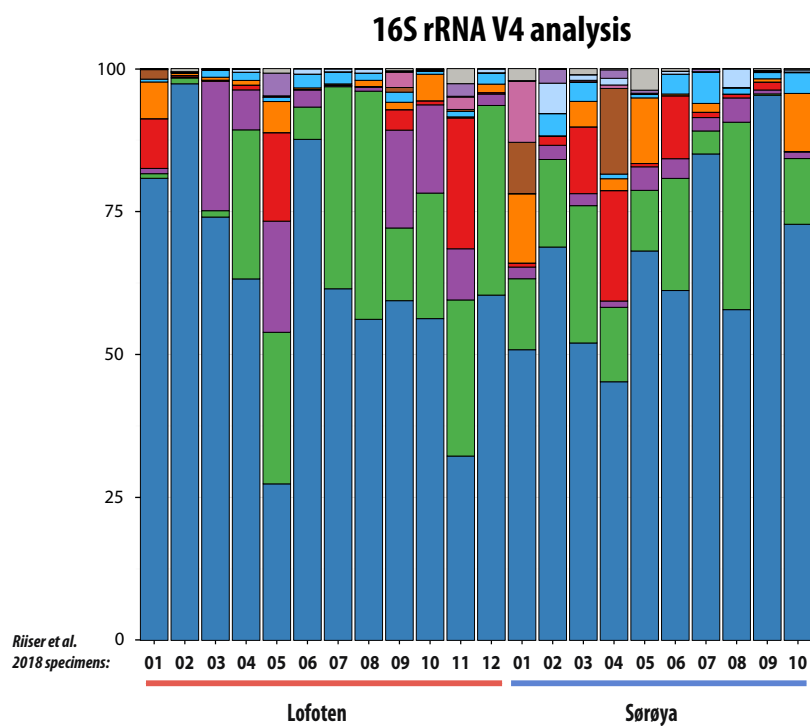

**Figure 3**

## Classification of sequencing reads

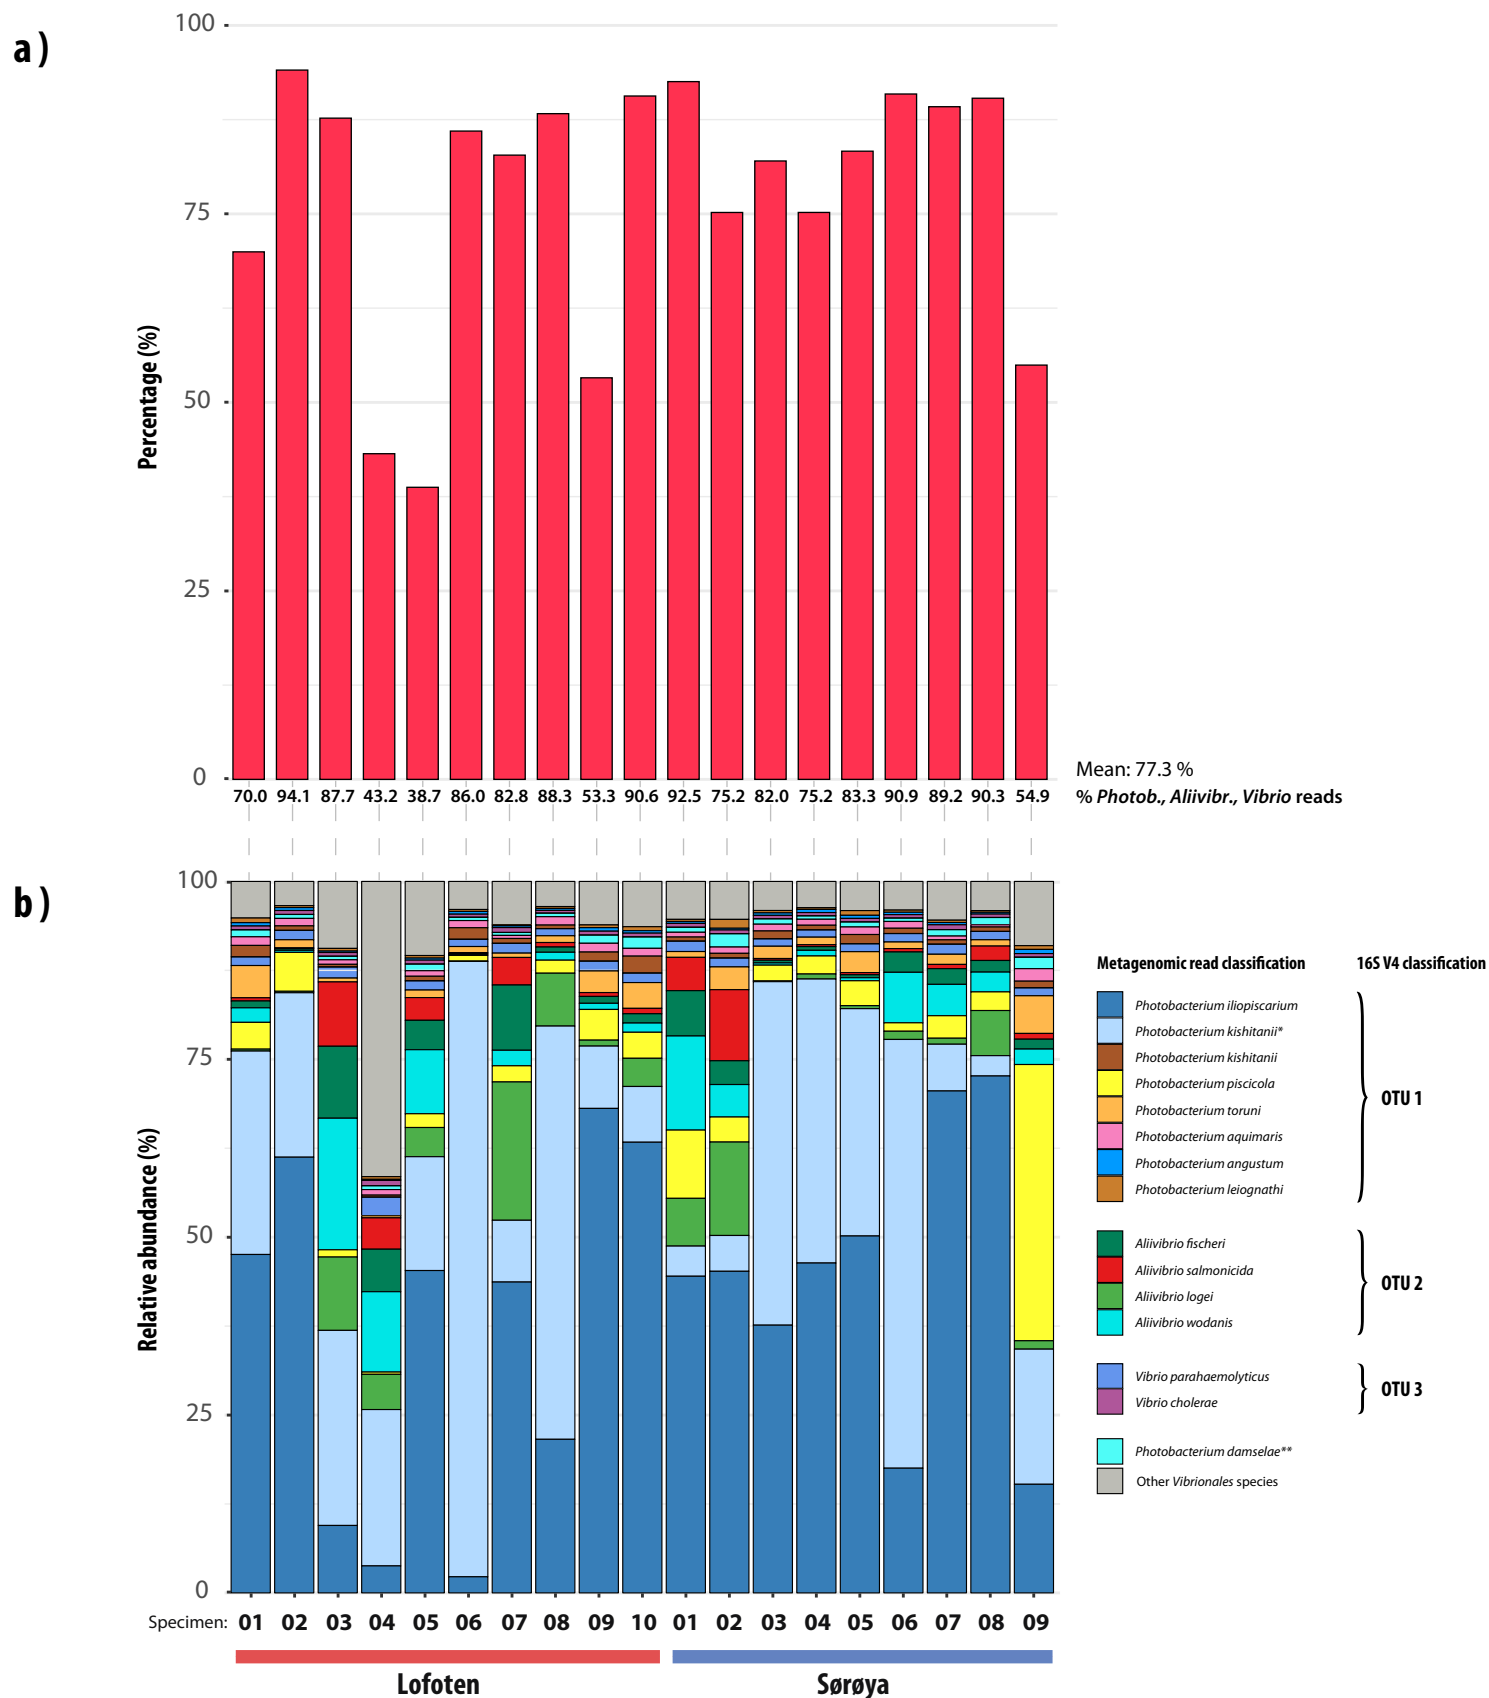

## Figure 4

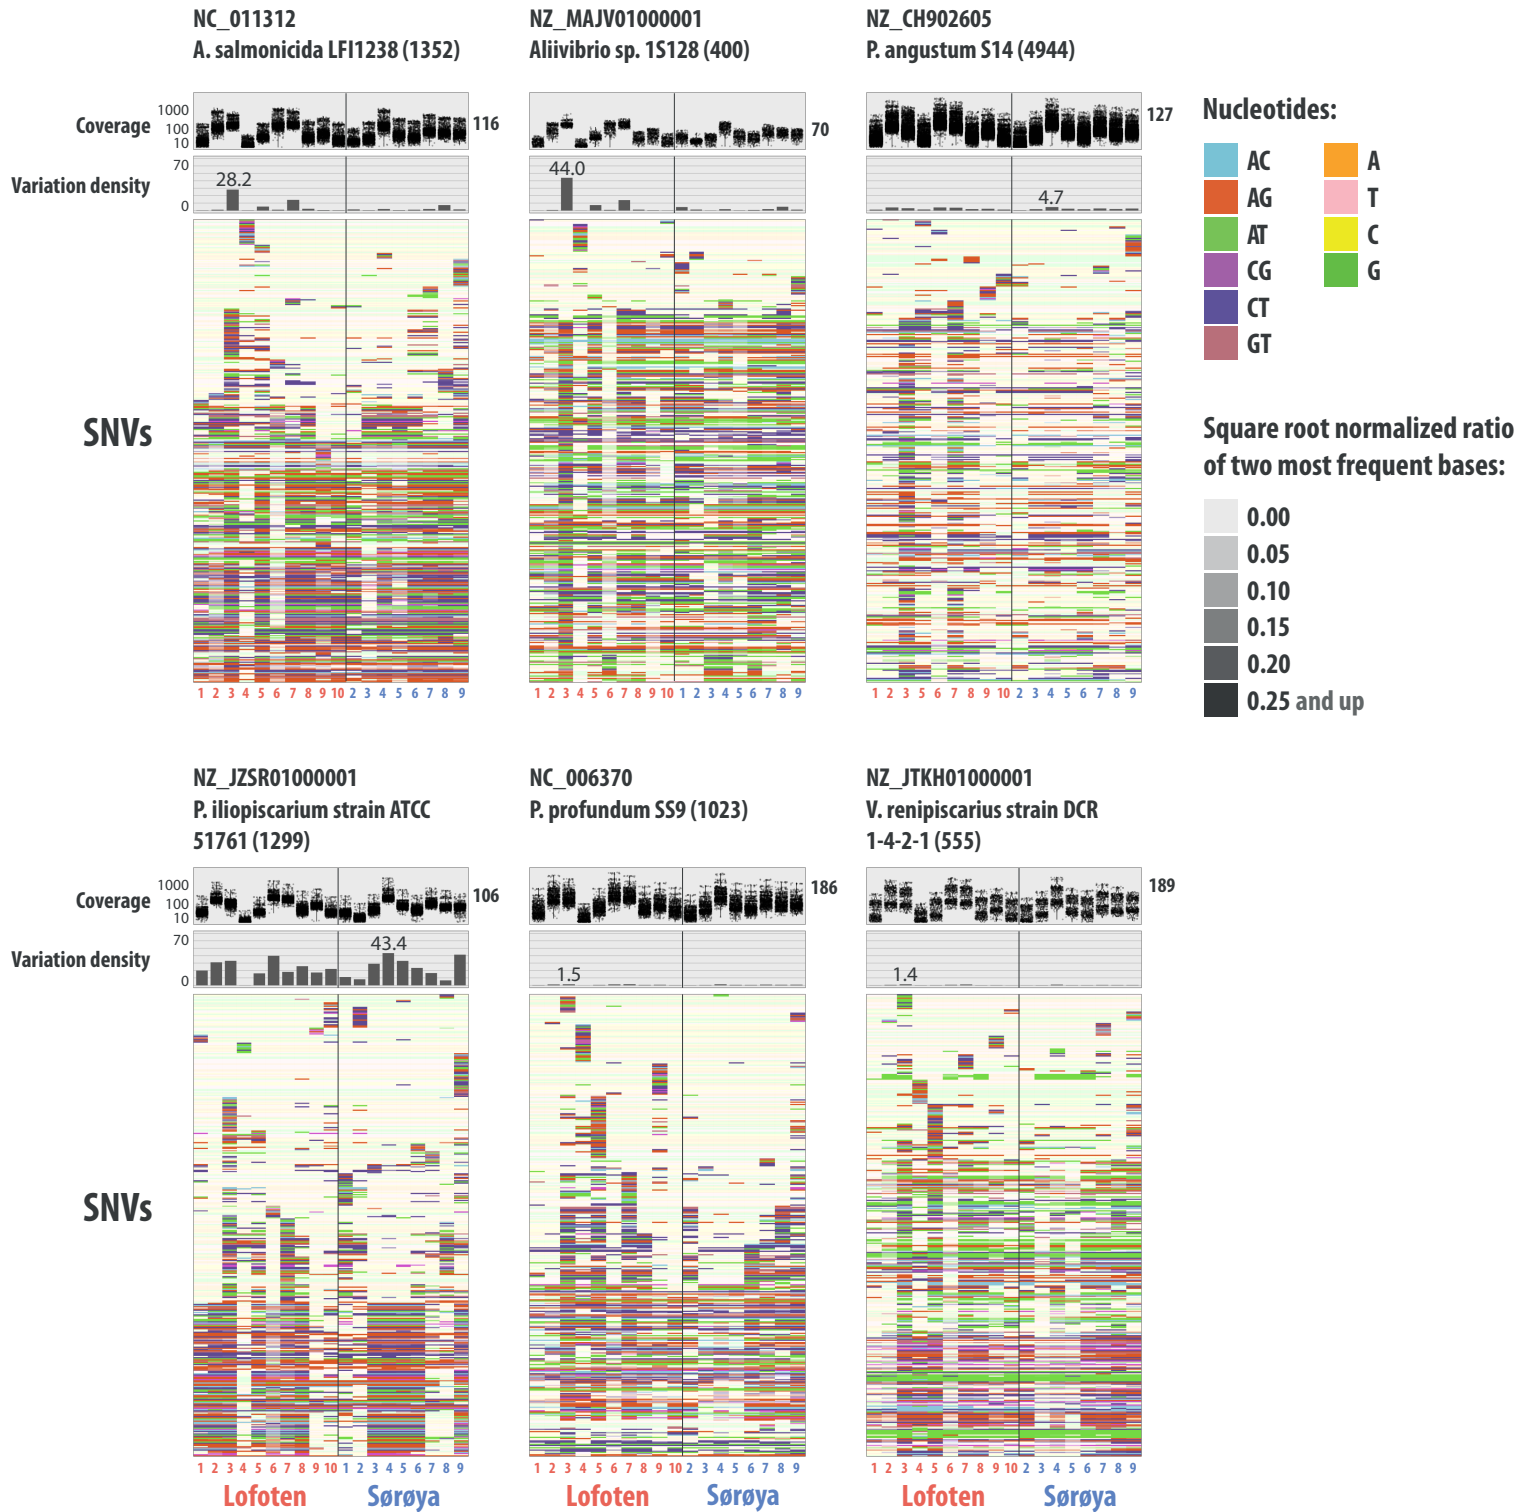

## Figure 5

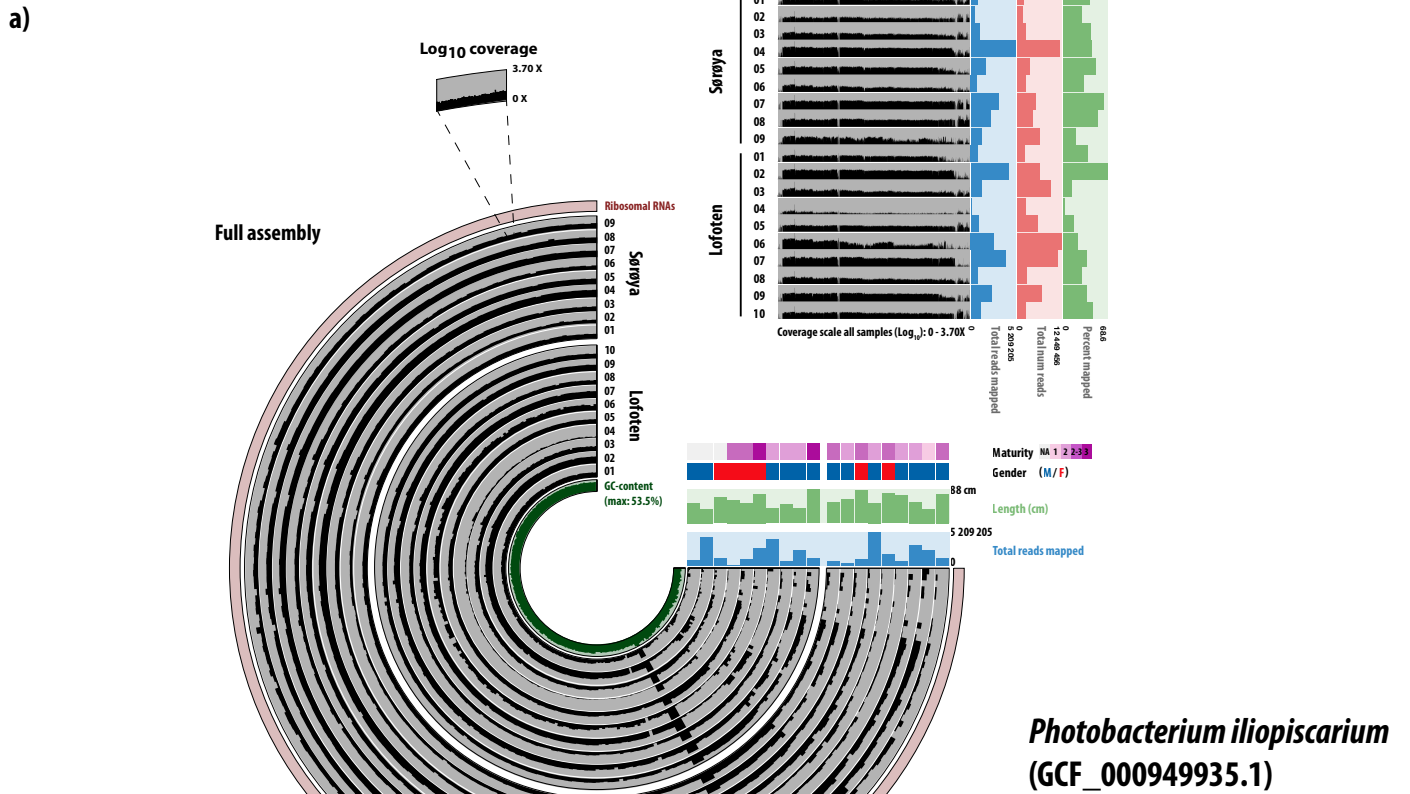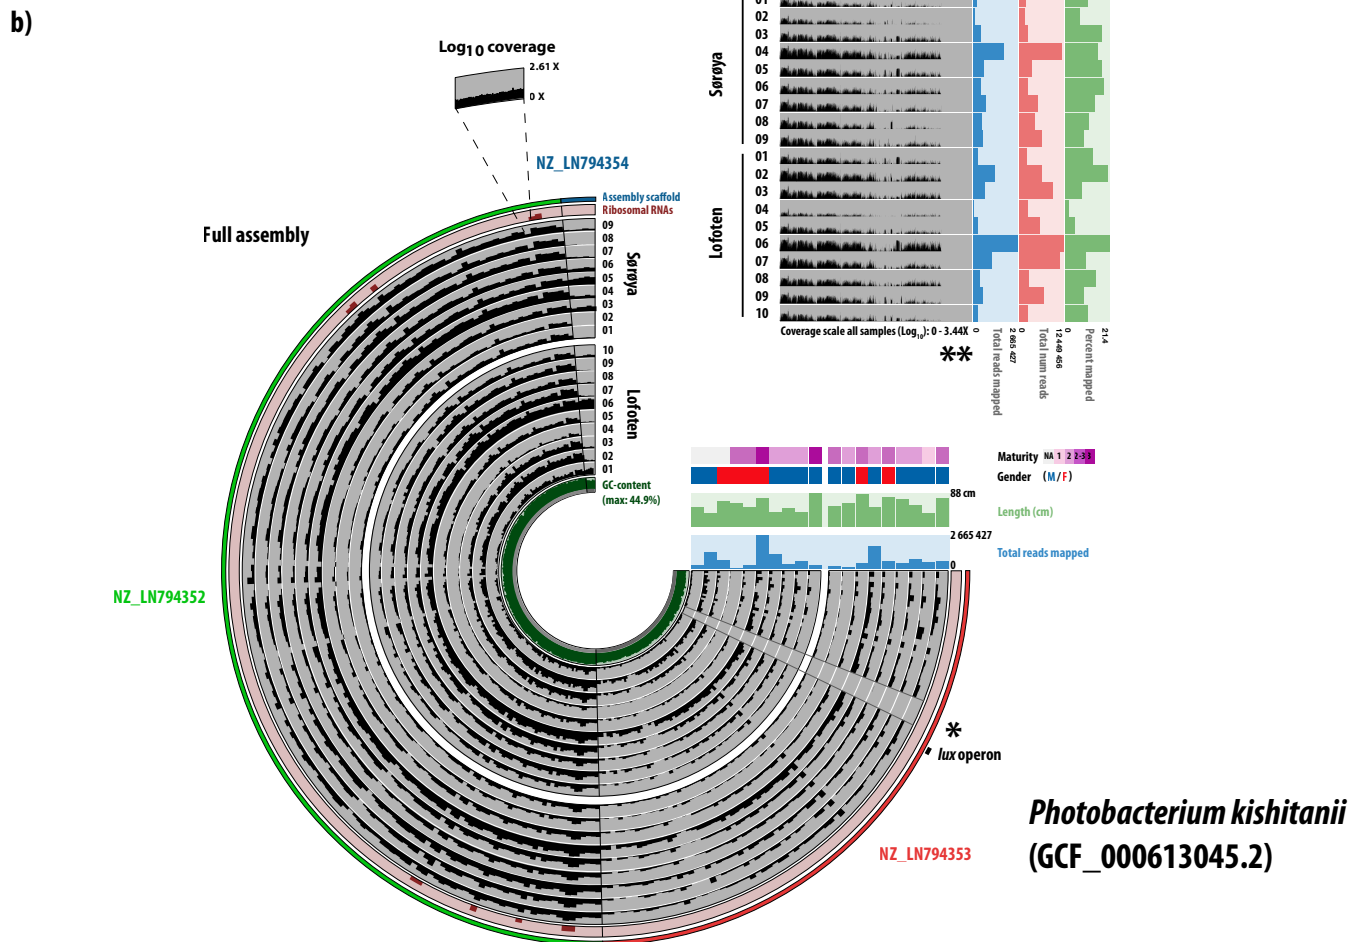



**Figure S2**

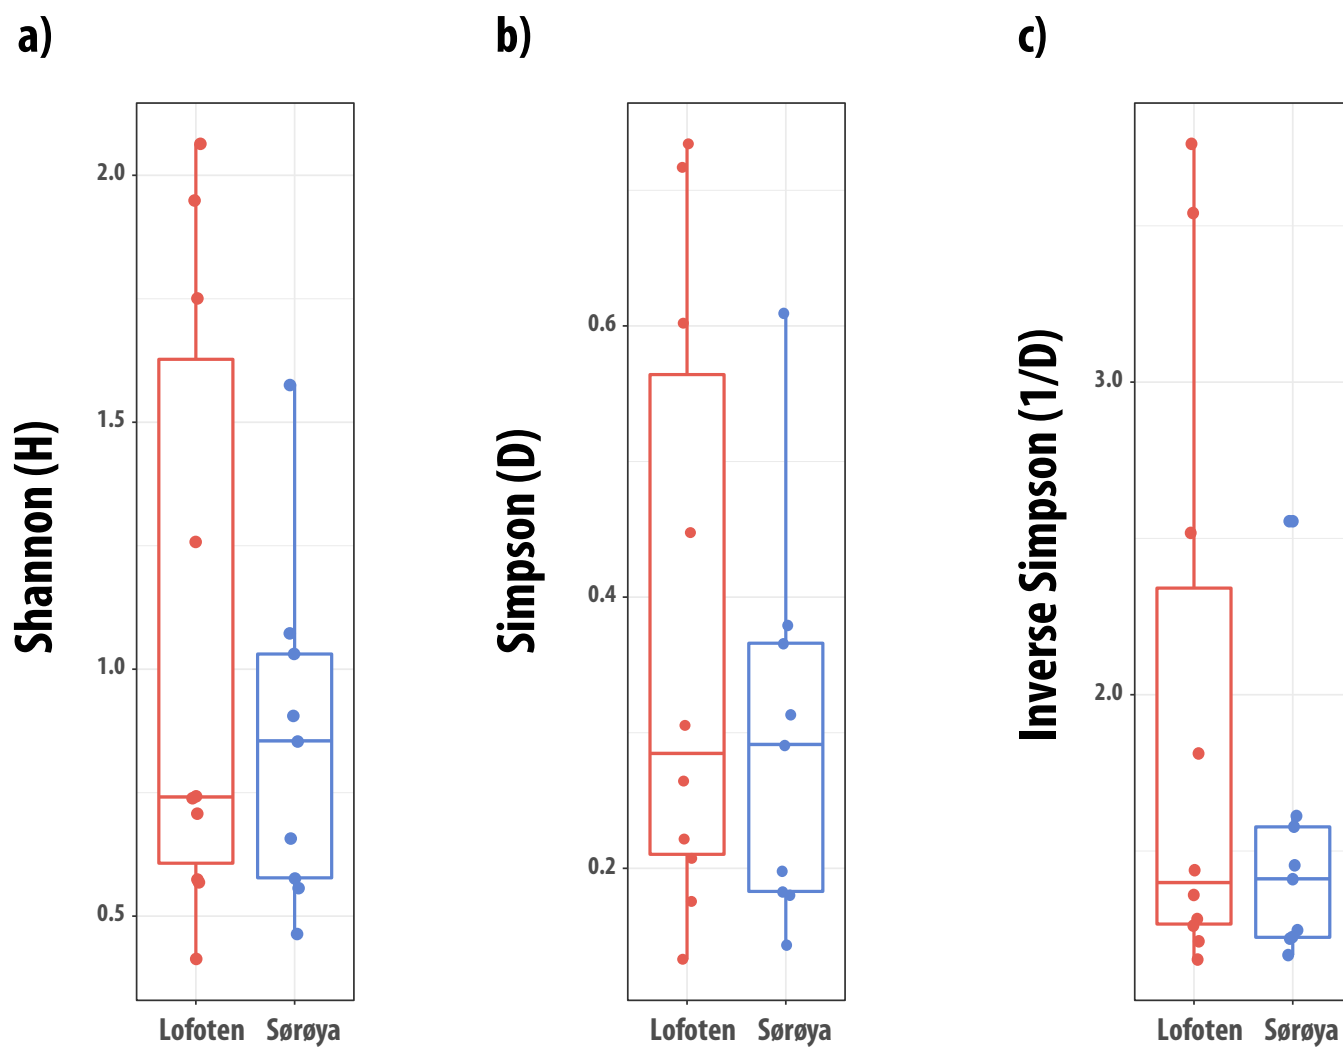

## Figure S3

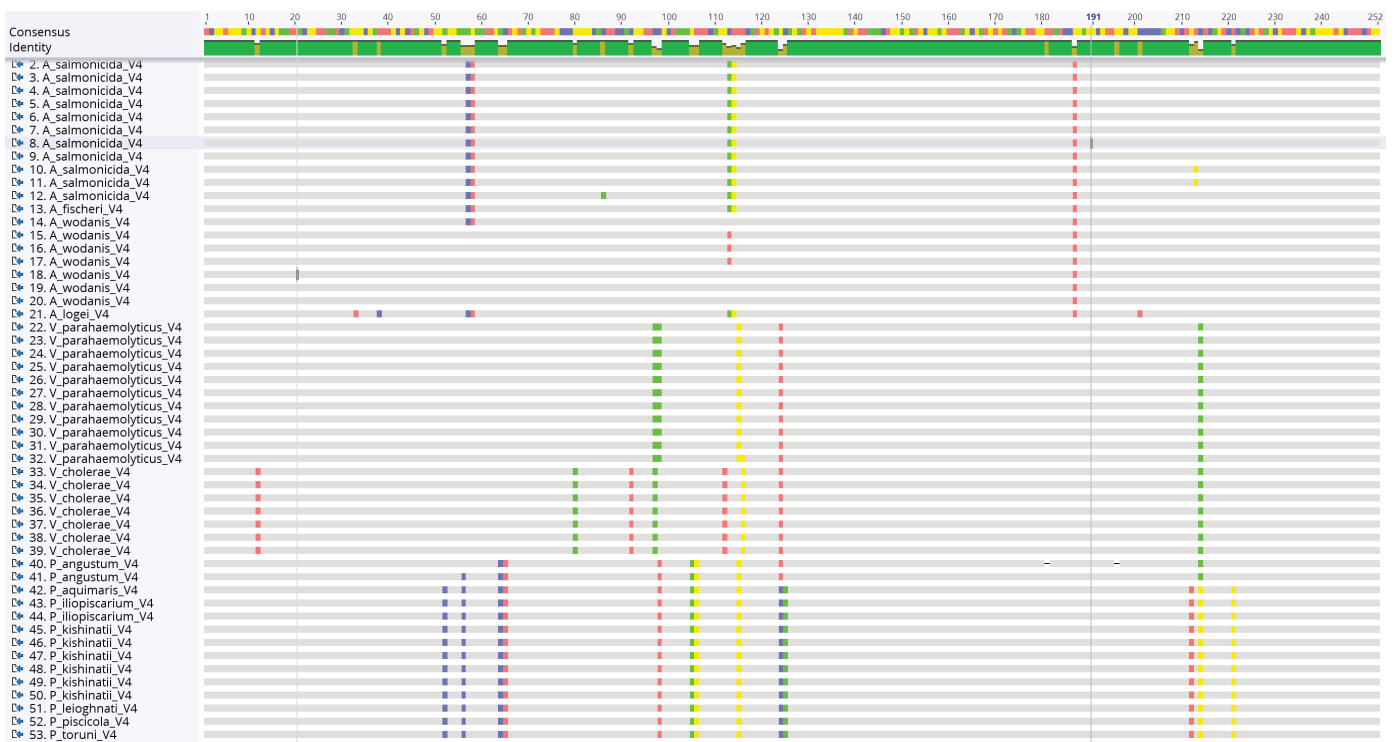

## Figure S4

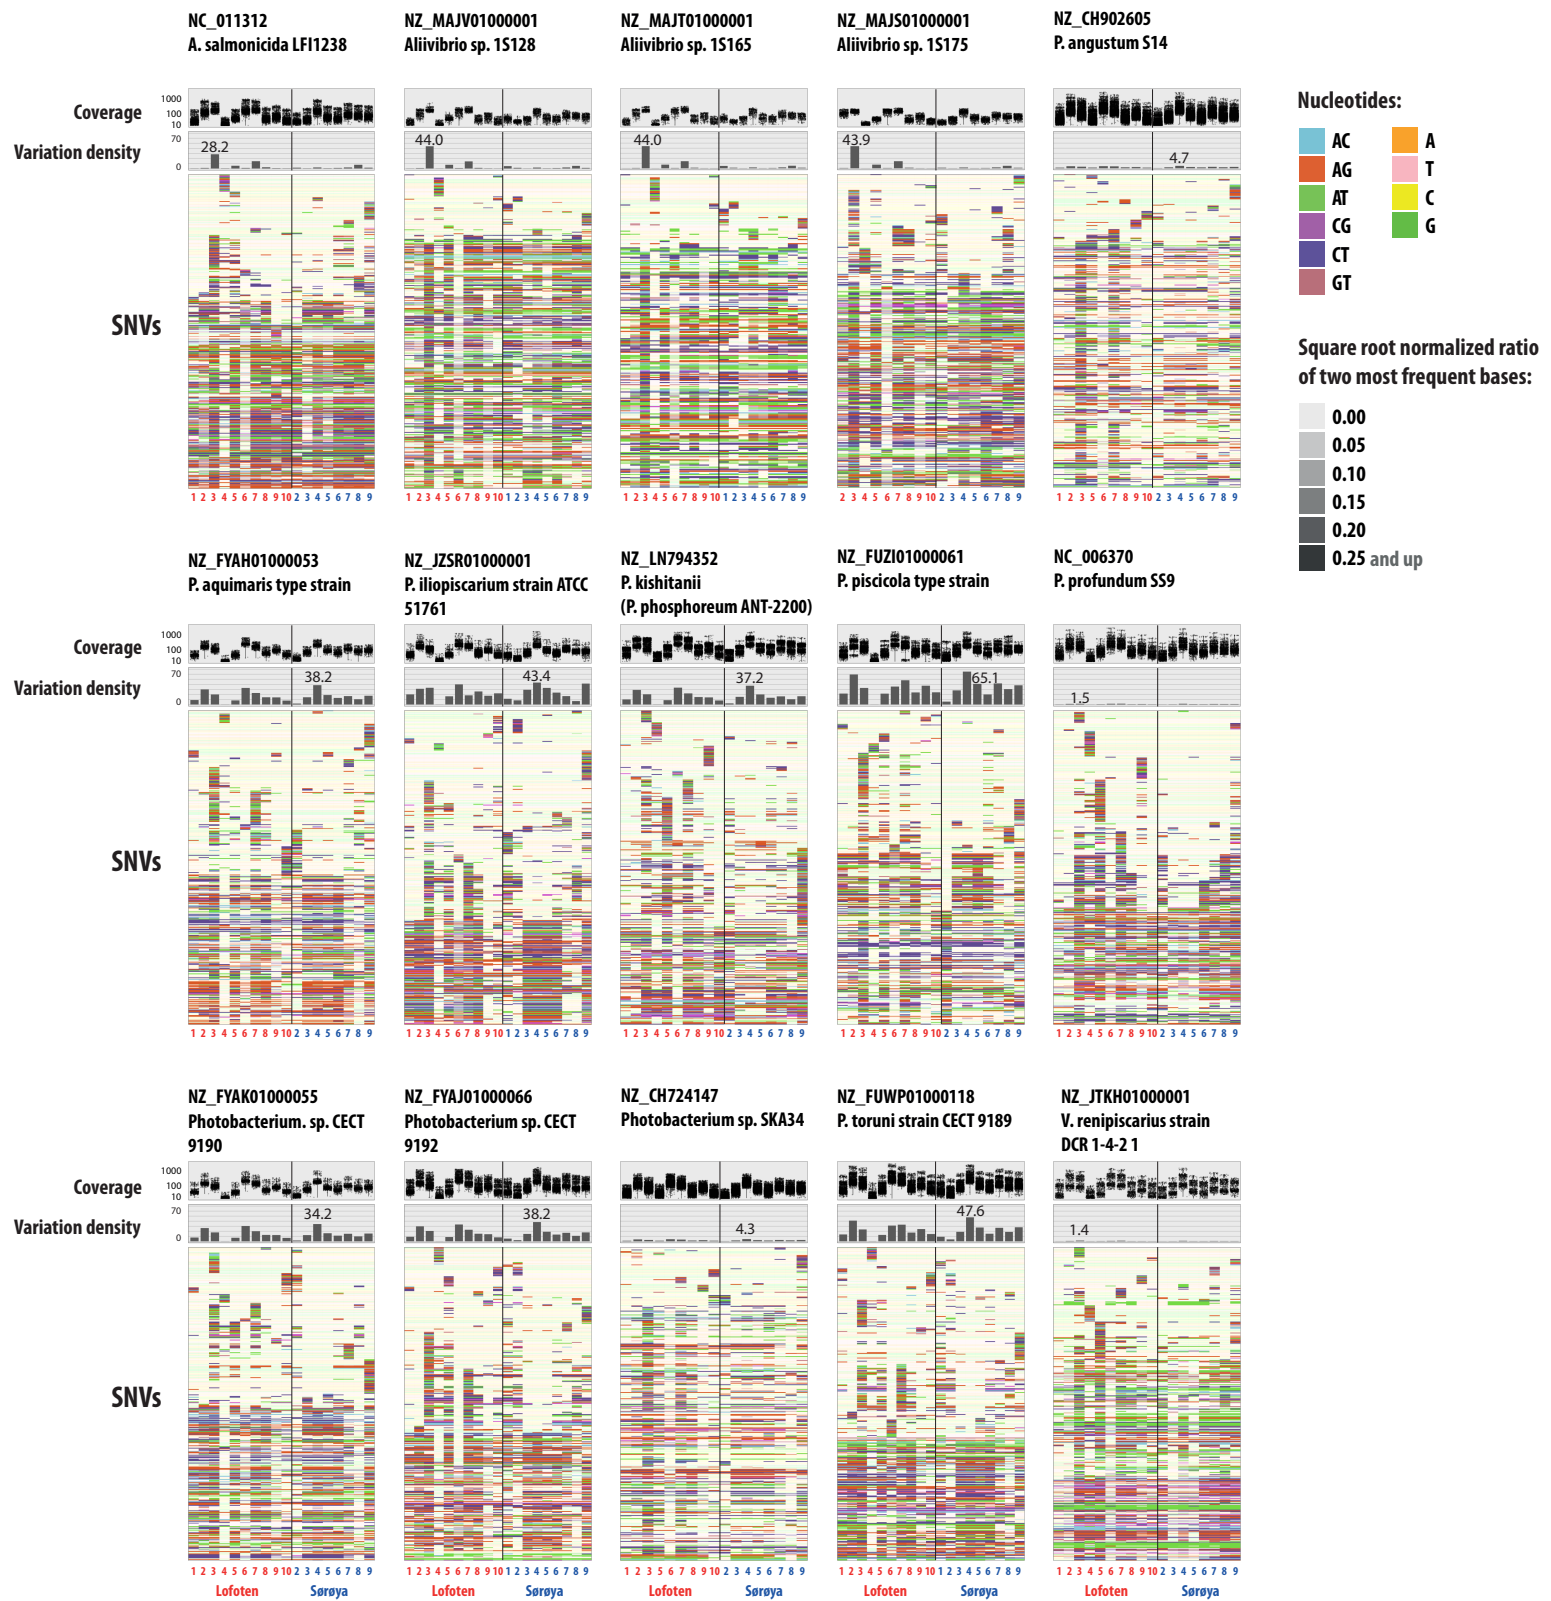



## Figure S5

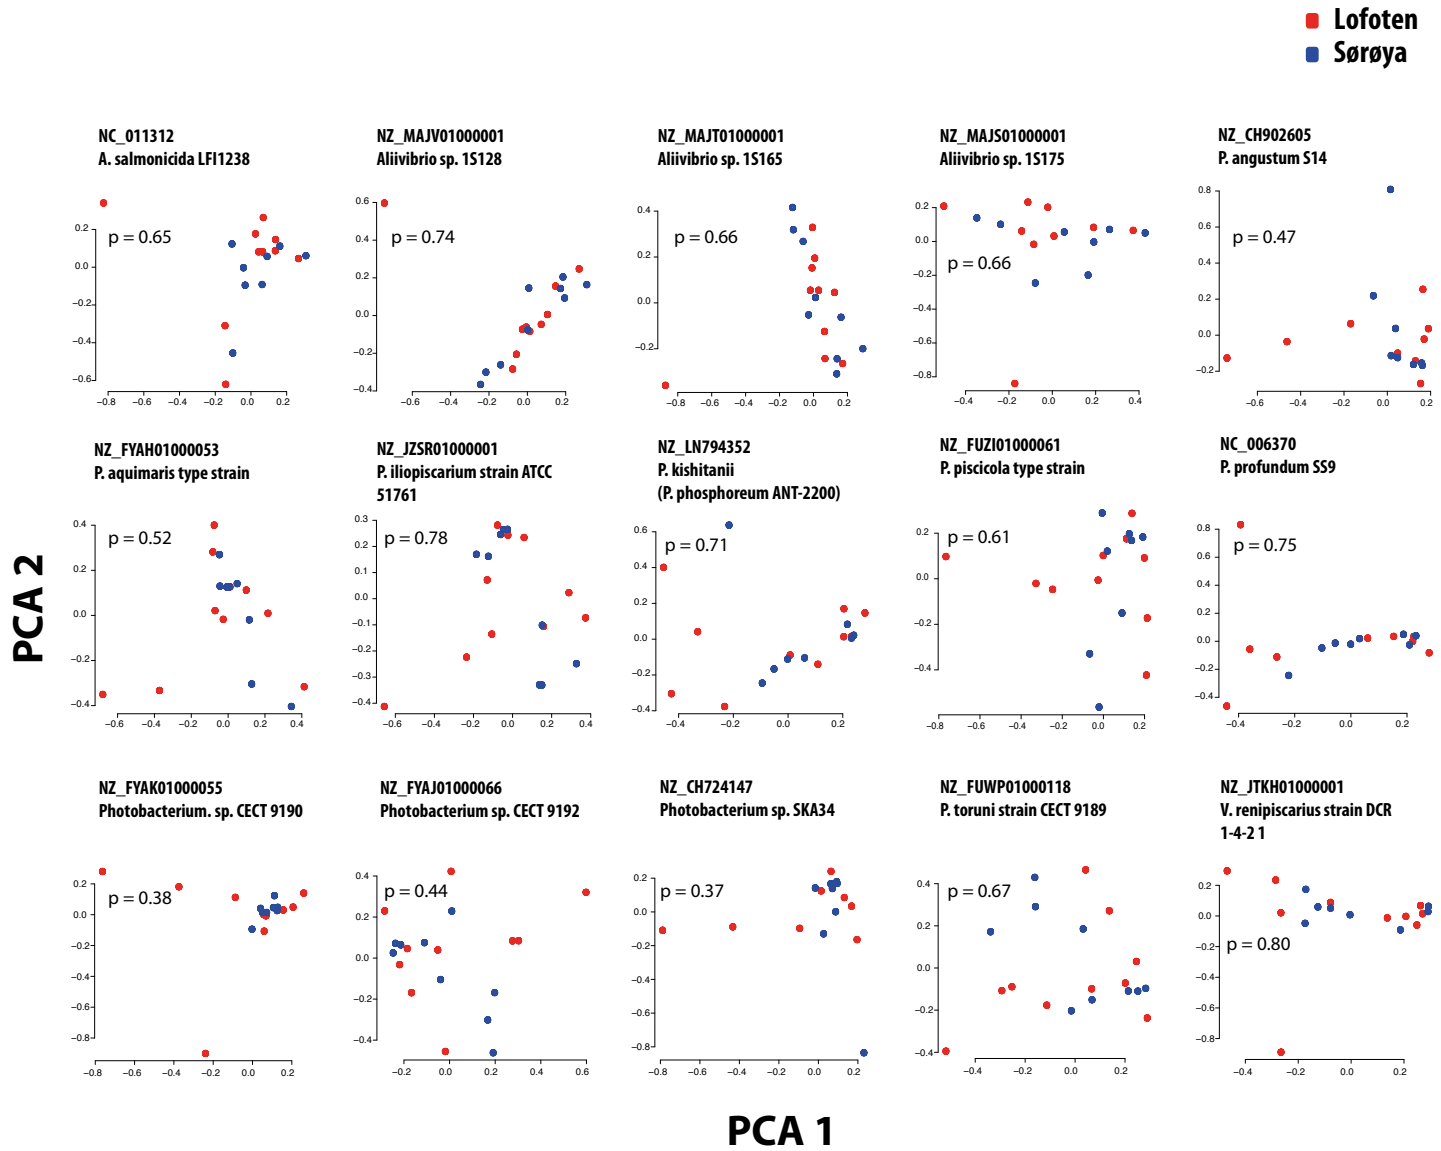

## Figure S6

a)

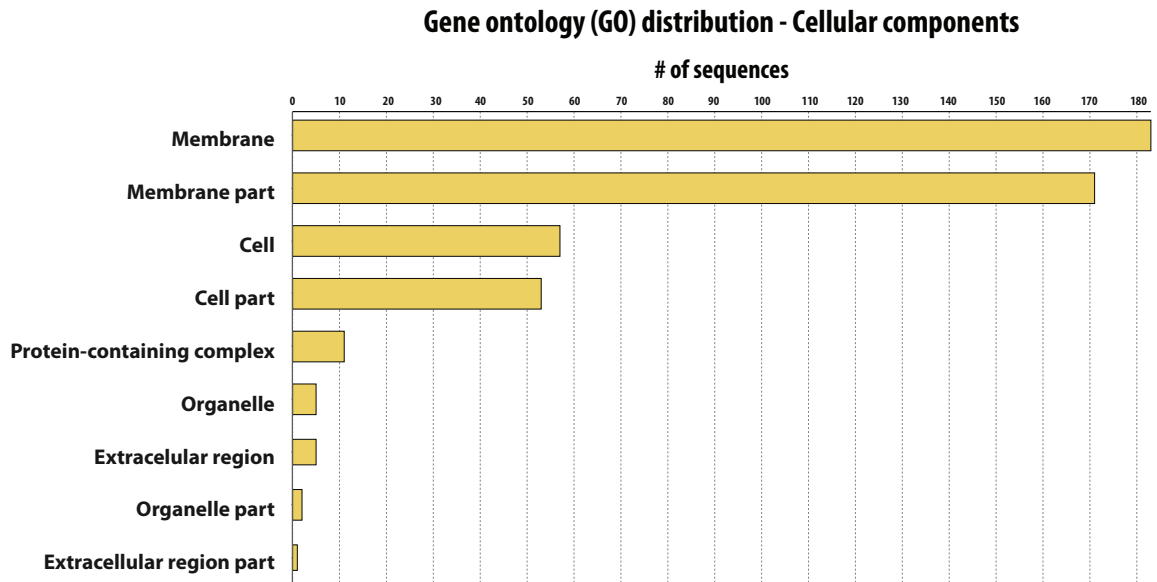

b)

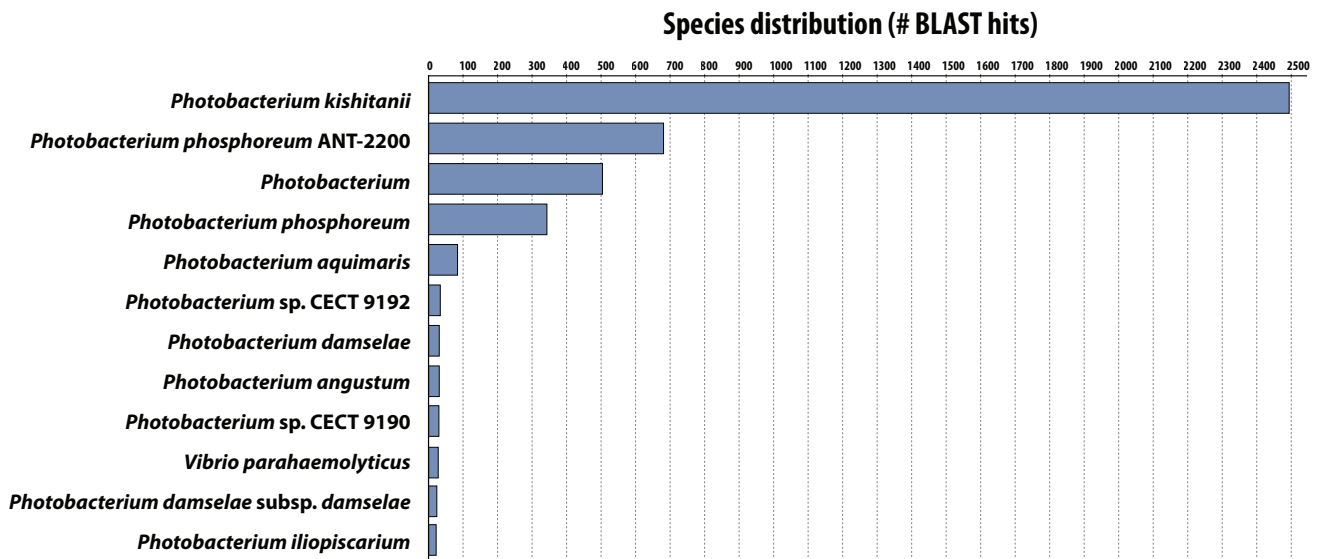

## Figure S7

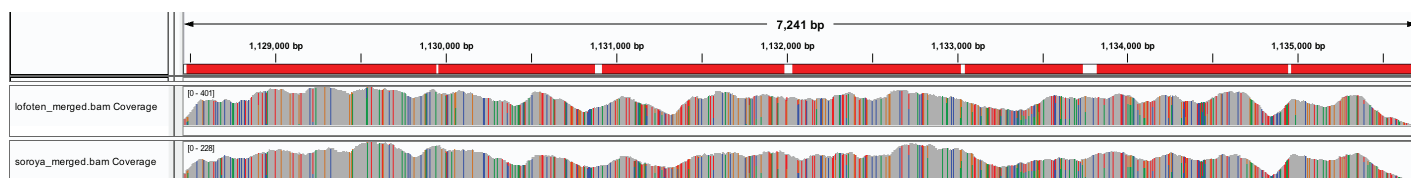

Source: https://www.biorxiv.org/content/10.1101/545889v1.full.pdf
